# Supplementary material for: Antibody-Dependent Enhancement with a Focus on SARS-CoV-2 and Anti-Glycan Antibodies
Source: MDPI journal article supplement (doi:10.3390/v15071584), 2023-07-20
Supplement: s1 [file s1]

## Supplementary SII

### List of ligands

| GID | Structure                                                             | Common Name   |
|-----|-----------------------------------------------------------------------|---------------|
| 1   | Fuc $\alpha$ -sp3                                                     | -             |
| 2   | Gal $\alpha$ -sp3                                                     | -             |
| 3   | Gal $\beta$ -sp3                                                      | -             |
| 4   | GalNAc $\alpha$ 1-OSer                                                | Tn-Ser        |
| 5   | GalNAc $\alpha$ -sp3                                                  | Tn            |
| 6   | GalNAc $\beta$ -sp3                                                   | -             |
| 7   | Glc $\alpha$ -sp3                                                     | -             |
| 9   | Glc $\beta$ -sp3                                                      | -             |
| 10  | GlcNAc $\beta$ -sp3                                                   | -             |
| 11  | GlcNAc $\beta$ -sp2                                                   | -             |
| 13  | GlcNAc $\beta$ -sp8                                                   | -             |
| 14  | GlcN(Gc)b-sp4                                                         | -             |
| 15  | HOCH <sub>2</sub> (HOCH) <sub>4</sub> CH <sub>2</sub> NH <sub>2</sub> | aminoglucitol |
| 16  | Man $\alpha$ -sp3                                                     | -             |
| 17  | Man $\alpha$ -sp4                                                     | -             |
| 18  | Man $\beta$ -sp4                                                      | -             |
| 19  | ManNAc $\beta$ -sp4                                                   | -             |
| 20  | Rha $\alpha$ -sp3                                                     | -             |
| 21  | Gal $\beta$ -sp4                                                      | -             |
| 22  | GlcNAc $\beta$ -sp4                                                   | -             |
| 23  | GalNAc $\beta$ -sp4                                                   | -             |
| 24  | GlcNAc $\alpha$ -sp3                                                  | -             |
| 25  | GalNAc $\beta$ -sp10                                                  | -             |
| 26  | Rha $\beta$ -sp4                                                      | -             |
| 28  | Xyl $\beta$ -sp4                                                      | -             |
| 29  | Fuc $\beta$ -sp4                                                      | -             |

|    |                       |                                  |
|----|-----------------------|----------------------------------|
| 30 | Glcβ-sp4              | -                                |
| 31 | L-Araα-sp4            | -                                |
| 32 | GalN(Gc)β-sp3         | -                                |
| 33 | Glc-2-NH2             | -                                |
| 34 | L-Glcβ-sp4            | -                                |
| 35 | GlcNAcβ-sp2           | -                                |
| 37 | 3-O-Su-Galβ-sp3       | -                                |
| 38 | 3-O-Su-GalNAcβ-sp3    | -                                |
| 41 | 6-O-Su-GalNAcα-sp3    | -                                |
| 43 | 6-O-Su-GlcNAcβ-sp3    | -                                |
| 44 | GlcAα-sp3             | α-glucuronic acid                |
| 45 | GlcAβ-sp3             | β-glucuronic acid, β-glucuronate |
| 46 | 6-H2PO3Glcβ-sp4       | Glc6P                            |
| 47 | 6-H2PO3Manα-sp3       | Man6P                            |
| 48 | Neu5Aα-sp3            | -                                |
| 49 | Neu5Aα-sp9            | -                                |
| 50 | Neu5Acβ-sp3           | -                                |
| 51 | Neu5Acβ-sp9           | -                                |
| 52 | Neu5Gcα-sp3           | -                                |
| 53 | Neu5Gcb-sp3           | -                                |
| 55 | 3-O-Su-GlcNAcβ-sp3    | -                                |
| 57 | D-Ribβ-sp4            | -                                |
| 58 | Fucβ-sp3              | -                                |
| 59 | αKdo-5-phosphate-sp11 | -                                |
| 60 | 6-O-Su-Galβ-sp3       | -                                |
| 61 | 3-O-Su-GalNAcα-sp3    | -                                |
| 62 | GlcAβ-sp2             | β-glucuronate                    |
| 63 | 4-O-Su-GlcNAcβ-sp2    | -                                |
| 64 | 4-O-Su-Galβ-sp3       | -                                |
| 65 | 4-O-Su-GalNAcα-sp3    | -                                |

|     |                                         |                           |
|-----|-----------------------------------------|---------------------------|
| 66  | 4-O-Su-GalNAc $\beta$ -sp3              | -                         |
| 71  | Fuc $\alpha$ 1-2Gal $\beta$ -sp3        | Hdi                       |
| 72  | Fuc $\alpha$ 1-3GlcNAc $\beta$ -sp3     | -                         |
| 73  | Fuc $\alpha$ 1-4GlcNAc $\beta$ -sp3     | Le                        |
| 75  | Gal $\alpha$ 1-2Gal $\beta$ -sp3        | -                         |
| 76  | Gal $\alpha$ 1-3Gal $\beta$ -sp3        | Bdi                       |
| 77  | Gal $\alpha$ 1-3GalNAc $\beta$ -sp3     | -                         |
| 78  | Gal $\alpha$ 1-3GalNAc $\alpha$ -sp3    | T $\alpha\alpha$ , core 8 |
| 80  | Gal $\alpha$ 1-3GlcNAc $\beta$ -sp3     | -                         |
| 81  | Gal $\alpha$ 1-4GlcNAc $\beta$ -sp3     | aLN                       |
| 82  | Gal $\alpha$ 1-4GlcNAc $\beta$ -sp8     | aLN                       |
| 83  | Gal $\alpha$ 1-6Glc $\beta$ -sp4        | melibiose                 |
| 84  | Gal $\beta$ 1-2Gal $\beta$ -sp3         | -                         |
| 85  | Gal $\beta$ 1-3GlcNAc $\beta$ -sp3      | Lec                       |
| 86  | Gal $\beta$ 1-3GlcNAc $\beta$ -sp2      | Lec                       |
| 87  | Gal $\beta$ 1-3Gal $\beta$ -sp3         | -                         |
| 88  | Gal $\beta$ 1-3GalNAc $\beta$ -sp3      | T $\beta\beta$            |
| 89  | Gal $\beta$ 1-3GalNAc $\alpha$ -sp3     | TF, core 1                |
| 92  | Gal $\beta$ 1-4Glc $\beta$ -sp2         | Lactose, Lac              |
| 93  | Gal $\beta$ 1-4Glc $\beta$ -sp4         | Lactose, Lac              |
| 94  | Gal $\beta$ 1-4Gal $\beta$ -sp4         | -                         |
| 96  | Gal $\beta$ 1-4GlcNAc $\beta$ -sp2      | N-acetyllactosamine, LN   |
| 97  | Gal $\beta$ 1-4GlcNAc $\beta$ -sp3      | N-acetyllactosamine, LN   |
| 98  | Gal $\beta$ 1-4GlcNAc $\beta$ -sp5      | N-acetyllactosamine, LN   |
| 99  | Gal $\beta$ 1-4GlcNAc $\beta$ -sp8      | N-acetyllactosamine, LN   |
| 100 | Gal $\beta$ 1-6Gal $\beta$ -sp4         | -                         |
| 101 | GalNAc $\alpha$ 1-3GalNAc $\beta$ -sp3  | Fs-2                      |
| 102 | GalNAc $\alpha$ 1-3Gal $\beta$ -sp3     | Adi                       |
| 103 | GalNAc $\alpha$ 1-3GalNAc $\alpha$ -sp3 | core 5                    |
| 104 | GalNAc $\beta$ 1-3Gal $\beta$ -sp3      | -                         |

|     |                                                     |             |
|-----|-----------------------------------------------------|-------------|
| 105 | GalNAc $\beta$ 1-3GalNAc $\beta$ -sp3               | para-Fs     |
| 106 | GalNAc $\beta$ 1-4GlcNAc $\beta$ -sp3               | LacdiNAc    |
| 107 | GalNAc $\beta$ 1-4GlcNAc $\beta$ -sp2               | LacdiNAc    |
| 110 | Glc $\alpha$ 1-4Glc $\beta$ -sp3                    | maltose     |
| 111 | Glc $\beta$ 1-4Glc $\beta$ -sp4                     | cellobiose  |
| 112 | Glc $\beta$ 1-6Glc $\beta$ -sp4                     | gentiobiose |
| 113 | GlcNAc $\beta$ 1-3GalNAc $\alpha$ -sp3              | core 3      |
| 114 | GlcNAc $\beta$ 1-3Man $\beta$ -sp4                  | -           |
| 116 | GlcNAc $\beta$ 1-4GlcNAc $\beta$ -sp3               | chitobiose  |
| 117 | GlcNAc $\beta$ 1-4GlcNAc $\beta$ -sp4               | chitobiose  |
| 118 | GlcNAc $\beta$ 1-6GalNAc $\alpha$ -sp3              | core 6      |
| 121 | Man $\alpha$ 1-4Man $\beta$ -sp4                    | -           |
| 122 | Man $\alpha$ 1-6Man $\beta$ -sp4                    | -           |
| 123 | Man $\beta$ 1-4GlcNAc $\beta$ -sp4                  | -           |
| 125 | 6-Bn-Gal $\beta$ 1-4GlcNAc $\beta$ -sp2             | -           |
| 126 | 6-Bn-Gal $\alpha$ 1-4(6-Bn)GlcNAc $\beta$ -sp3      | -           |
| 128 | Gal $\beta$ 1-4Glc $\beta$ -sp4-Trp                 | -           |
| 129 | Gal $\beta$ 1-3(6-O-Bn)GlcNAc $\beta$ -sp3          | -           |
| 130 | (6-O-Bn-Gal $\beta$ 1)-3GlcNAc $\beta$ -sp2         | -           |
| 131 | (6-O-Bn-Gal $\beta$ 1)-3(6-O-Bn)GlcNAc $\beta$ -sp3 | -           |
| 132 | Gal $\beta$ 1-3GalNAc $\alpha$ -sp5                 | TF          |
| 133 | Gal $\beta$ 1-4Glc $\beta$ -sp4-Ala                 | -           |
| 135 | Gal $\beta$ 1-4Glc $\beta$ -sp4-Asn                 | -           |
| 136 | Gal $\beta$ 1-4Glc $\beta$ -sp4-Ile                 | -           |
| 137 | Gal $\beta$ 1-4Glc $\beta$ -sp4-Nle                 | -           |
| 138 | Gal $\beta$ 1-4Glc $\beta$ -sp4-Val                 | -           |
| 139 | Gal $\beta$ 1-4GlcNAc $\alpha$ -sp3                 | -           |
| 140 | Gal $\alpha$ 1-3GalNAc(fur)b-sp3                    | -           |
| 142 | GlcNAc $\alpha$ 1-3GalNAc $\beta$ -sp3              | -           |
| 143 | Fuc $\alpha$ 1-2(3-O-Su)Gal $\beta$ -sp3            | -           |

|     |                                                                       |            |
|-----|-----------------------------------------------------------------------|------------|
| 144 | Gal $\beta$ 1-3(6-O-Su)GlcNAc $\beta$ -sp2                            | -          |
| 145 | Gal $\beta$ 1-3(6-O-Su)GlcNAc $\beta$ -sp3                            | -          |
| 146 | Gal $\beta$ 1-4(6-O-Su)Glc $\beta$ -sp2                               | -          |
| 149 | GlcNAc $\beta$ 1-4(6-O-Su)GlcNAc $\beta$ -sp2                         | -          |
| 150 | 3-O-Su-Gal $\beta$ 1-3GalNAc $\alpha$ -sp3                            | -          |
| 151 | 6-O-Su-Gal $\beta$ 1-3GalNAc $\alpha$ -sp3                            | -          |
| 153 | 6-O-Su-Gal $\beta$ 1-4Glc $\beta$ -sp2                                | -          |
| 154 | 3-O-Su-Gal $\beta$ 1-3GlcNAc $\beta$ -sp3                             | -          |
| 156 | 3-O-Su-Gal $\beta$ 1-4GlcNAc $\beta$ -sp2                             | -          |
| 158 | 4-O-Su-Gal $\beta$ 1-4GlcNAc $\beta$ -sp2                             | -          |
| 159 | 4-O-Su-Gal $\beta$ 1-4GlcNAc $\beta$ -sp3                             | -          |
| 160 | 6-O-Su-Gal $\beta$ 1-3GlcNAc $\beta$ -sp2                             | -          |
| 161 | 6-O-Su-Gal $\beta$ 1-3GlcNAc $\beta$ -sp3                             | -          |
| 162 | 6-O-Su-Gal $\beta$ 1-4GlcNAc $\beta$ -sp2                             | -          |
| 164 | GlcA $\beta$ 1-3GlcNAc $\beta$ -sp3                                   | -          |
| 165 | GlcA $\beta$ 1-3Gal $\beta$ -sp3                                      | -          |
| 166 | GlcA $\beta$ 1-6Gal $\beta$ -sp3                                      | -          |
| 167 | GlcNAc $\beta$ 1-4-[HOOC(CH <sub>3</sub> )CH]-3-O-GlcNAc $\beta$ -sp4 | GlcNAc-Mur |
| 168 | GlcNAc $\beta$ 1-4Mur-L-Ala-D-i-Gln-Lys                               | GMDP-Lys   |
| 169 | Neu5Ac $\alpha$ 2-3Gal $\beta$ -sp3                                   | GM4        |
| 170 | Neu5Ac $\alpha$ 2-6Gal $\beta$ -sp3                                   | -          |
| 171 | Neu5Ac $\alpha$ 2-3GalNAc $\alpha$ -sp3                               | -          |
| 172 | Neu5Ac $\alpha$ 2-6GalNAc $\alpha$ -sp3                               | SiaTn      |
| 173 | Neu5Ac $\beta$ 2-6GalNAc $\alpha$ -sp3                                | -          |
| 174 | Neu5Gc $\alpha$ 2-6GalNAc $\alpha$ -sp3                               | Neu5GcTn   |
| 177 | 3-O-Su-Gal $\beta$ 1-4(6-O-Su)GlcNAc $\beta$ -sp3                     | -          |
| 178 | 6-O-Su-Gal $\beta$ 1-4(6-O-Su)Glc $\beta$ -sp2                        | -          |
| 179 | 6-O-Su-Gal $\beta$ 1-3(6-O-Su)GlcNAc $\beta$ -sp2                     | -          |
| 180 | 6-O-Su-Gal $\beta$ 1-4(6-O-Su)GlcNAc $\beta$ -sp2                     | -          |
| 181 | 3,4-O-Su <sub>2</sub> -Gal $\beta$ 1-4GlcNAc $\beta$ -sp3             | -          |

|     |                                          |                   |
|-----|------------------------------------------|-------------------|
| 182 | 3,6-O-Su2-Galβ1-4GlcNAcβ-sp2             | -                 |
| 183 | 4,6-O-Su2-Galβ1-4GlcNAcβ-sp2             | -                 |
| 184 | 4,6-O-Su2-Galβ1-4GlcNAcβ-sp3             | -                 |
| 186 | Neu5Acα2-8Neu5Acα2-sp3                   | (Neu5Ac)2, (Sia)2 |
| 187 | Neu5Acα2-8Neu5Acα2-sp9                   | (Sia)2            |
| 188 | Neu5Acα2-8Neu5Acβ-sp9                    | -                 |
| 189 | 3,6-O-Su2-Galβ1-4(6-O-Su)GlcNAcβ-sp2     | -                 |
| 190 | Galβ1-4-(6-P)GlcNAcβ-sp2                 | -                 |
| 191 | 6-P-Galβ1-4GlcNAcβ-sp2                   | -                 |
| 192 | GalNAcβ1-4(6-O-Su)GlcNAcβ-sp3            | -                 |
| 193 | 3-O-Su-GalNAcβ1-4GlcNAcβ-sp3             | -                 |
| 194 | 6-O-Su-GalNAcβ1-4GlcNAcβ-sp3             | -                 |
| 195 | 6-O-Su-GalNAcβ1-4(3-O-Ac)GlcNAcβ-sp3     | -                 |
| 196 | 3-O-Su-GalNAcβ1-4(3-O-Su)GlcNAcβ-sp3     | -                 |
| 197 | 3,6-O-Su2-GalNAcβ1-4GlcNAcβ-sp3          | -                 |
| 198 | 4,6-O-Su2-GalNAcβ1-4GlcNAcβ-sp3          | -                 |
| 199 | 4,6-O-Su2-GalNAcβ1-4-(3-O-Ac)GlcNAcβ-sp3 | -                 |
| 200 | 4-O-Su-GalNAcβ1-4GlcNAcβ-sp3             | -                 |
| 202 | 6-O-Su-GalNAcβ1-4(6-O-Su)GlcNAcβ-sp3     | -                 |
| 203 | Galβ1-4(6-O-Su)GlcNAcβ-sp2               | -                 |
| 204 | 4-O-Su-GalNAcβ1-4GlcNAcβ-sp2             | -                 |
| 205 | Neu5Acα2-6GalNAcβ-sp3                    | -                 |
| 206 | Neu5Gcα2-3Galβ-sp3                       | -                 |
| 208 | Galβ1-3GlcNAcβ-sp4                       | Lec               |
| 209 | αKdo-(2→4)-αKdo-sp11                     | -                 |
| 211 | αKdo-(2→8)-αKdo-sp11                     | -                 |
| 213 | Neu5Acβ2-6Galβ-sp3                       | -                 |
| 214 | DGlcAβ1-3Galβ-sp3                        | ΔGlcAβ3Gal        |
| 215 | Fucα1-2Galβ1-3GlcNAcβ-sp3                | Led, H (type 1)   |
| 216 | Fucα1-2Galβ1-4GlcNAcβ-sp3                | H (type 2)        |

|     |                                                                              |                 |
|-----|------------------------------------------------------------------------------|-----------------|
| 217 | Fuca1-2Galβ1-3GalNAcα-sp3                                                    | H (type 3)      |
| 219 | Fuca1-2Galβ1-4Glcβ-sp4                                                       | H (type 6)      |
| 221 | Galα1-3Galβ1-4Glcβ-sp4                                                       | -               |
| 222 | Galα1-3Galβ1-4GlcNAcβ-sp3                                                    | Galili (tri)    |
| 223 | Galα1-4Galβ1-4Glcβ-sp2                                                       | Pk, Gb3, GbOse3 |
| 225 | Galα1-4Galβ1-4GlcNAcβ-sp2                                                    | P1              |
| 226 | Galα1-3(Fuca1-2)Galβ-sp3                                                     | Btri            |
| 227 | Galα1-3(Fuca1-2)Galβ-sp5                                                     | Btri            |
| 228 | Galβ1-2Galα1-3GlcNAcβ-sp3                                                    | -               |
| 229 | Galβ1-3Galβ1-4GlcNAcβ-sp4                                                    | -               |
| 230 | Fucβ1-2Galβ1-3GlcNAcβ-sp3                                                    | -               |
| 231 | Galβ1-4GlcNAcβ1-3GalNAcα-sp3                                                 | -               |
| 232 | Galβ1-4GlcNAcβ1-6GalNAcα-sp3                                                 | -               |
| 233 | Galβ1-3(Fuca1-4)GlcNAcβ-sp3                                                  | Lea             |
| 234 | Galβ1-4(Fuca1-3)GlcNAcβ-sp3                                                  | Lex             |
| 235 | GalNAcα1-3(Fuca1-2)Galβ-sp3                                                  | Atri            |
| 236 | GalNAcα1-3(Fuca1-2)Galβ-sp5                                                  | Atri            |
| 237 | GalNHα1-3(Fuca1-2)Galβ-OCH <sub>2</sub> CH <sub>2</sub> CH <sub>2</sub> NHAc | ABtri           |
| 239 | GalNAcβ1-3(Fuca1-2)Galβ-sp3                                                  | -               |
| 240 | (Glcα1-4)3β-sp4                                                              | maltotriose     |
| 241 | (Glcα1-6)3β-sp4                                                              | isomaltotriose  |
| 242 | GlcNAcα1-3Galβ1-4GlcNAcβ-sp2                                                 | -               |
| 243 | GlcNAcα1-3Galβ1-4GlcNAcβ-sp3                                                 | -               |
| 245 | GlcNAcα1-6Galβ1-4GlcNAcβ-sp2                                                 | -               |
| 246 | GlcNAcβ1-2Galβ1-3GalNAcα-sp3                                                 | -               |
| 247 | GlcNAcβ1-3Galβ1-3GalNAcα-sp3                                                 | -               |
| 249 | GlcNAcβ1-3Galβ1-4GlcNAcβ-sp2                                                 | -               |
| 250 | GlcNAcβ1-3Galβ1-4GlcNAcβ-sp3                                                 | -               |
| 251 | GlcNAcβ1-4Galβ1-4GlcNAcβ-sp2                                                 | -               |
| 252 | GlcNAcβ1-4GlcNAcβ1-4GlcNAcβ-sp4                                              | chitotriose     |

|     |                                                             |             |
|-----|-------------------------------------------------------------|-------------|
| 253 | GlcNAc $\beta$ 1-6Gal $\beta$ 1-4GlcNAc $\beta$ -sp2        | -           |
| 254 | GlcNAc $\beta$ 1-6(Gal $\beta$ 1-3)GalNAc $\alpha$ -sp3     | core 2      |
| 255 | GlcNAc $\beta$ 1-6(GlcNAc $\beta$ 1-3)GalNAc $\alpha$ -sp3  | core 4      |
| 256 | GlcNAc $\beta$ 1-6(GlcNAc $\beta$ 1-4)GalNAc $\alpha$ -sp3  | -           |
| 258 | Man $\alpha$ 1-6(Man $\alpha$ 1-3)Man $\beta$ -sp4          | Man3        |
| 259 | Gal $\beta$ 1-4(Gal $\beta$ 1-3)GlcNAc $\beta$ -sp3         | -           |
| 260 | Gal $\beta$ 1-3(Fuc $\beta$ 1-4)GlcNAc $\beta$ -sp3         | -           |
| 263 | (GalNAc $\beta$ -PEG2)3- $\beta$ -DD                        | -           |
| 264 | Gal $\beta$ 1-4Gal $\beta$ 1-4GlcNAc $\beta$ -sp3           | -           |
| 266 | Gal $\alpha$ 1-4Gal $\beta$ 1-4GlcNAc $\beta$ -sp3          | P1          |
| 267 | GlcNAc $\beta$ 1-3Gal $\beta$ 1-3GlcNAc $\beta$ -sp3        | -           |
| 268 | GlcNAc $\beta$ 1-4(Fuc $\alpha$ 1-6)GlcNAc $\beta$ -sp3     | -           |
| 272 | Neu5Ac $\alpha$ 2-3Gal $\beta$ 1-4Glc $\beta$ -sp4-Cit      | -           |
| 273 | Fuc $\beta$ 1-2Gal $\beta$ 1-4GlcNAc $\beta$ -sp3           | -           |
| 274 | GalNAc $\alpha$ 1-3Gal $\beta$ 1-4GlcNAc $\beta$ -sp3       | -           |
| 275 | GalNAc $\beta$ 1-3Gal $\beta$ 1-4GlcNAc $\beta$ -sp3        | -           |
| 276 | GlcNAc $\beta$ 1-4Gal $\beta$ 1-4GlcNAc $\beta$ -sp3        | -           |
| 277 | GalN(Gc) $\alpha$ 1-3(Fuc $\alpha$ 1-2)Gal $\beta$ -sp3     | Atri(Gc)    |
| 278 | GalNAc $\alpha$ 1-3GalNAc $\beta$ 1-3Gal $\beta$ -sp3       | Fs-3        |
| 279 | Gal $\beta$ 1-3GlcNAc $\alpha$ 1-3GalNAc $\alpha$ -sp3      | LeCa3Tn     |
| 280 | Gal $\beta$ 1-3GlcNAc $\beta$ 1-3GalNAc $\alpha$ -sp3       | -           |
| 281 | Fuc $\alpha$ 1-2Gal $\beta$ 1-3GalNAc $\beta$ -sp3          | H type4     |
| 282 | Gal $\beta$ 1-3Gal $\beta$ 1-4GlcNAc $\beta$ -sp3           | -           |
| 283 | GlcNAc $\alpha$ 1-4Gal $\beta$ 1-4GlcNAc $\beta$ -sp3       | -           |
| 287 | 3-O-Su-Gal $\beta$ 1-3(Fuc $\alpha$ 1-4)GlcNAc $\beta$ -sp3 | 3'-O-Su-Lea |
| 288 | 3-O-Su-Gal $\beta$ 1-4(Fuc $\alpha$ 1-3)GlcNAc $\beta$ -sp3 | 3'-O-Su-Lex |
| 289 | Neu5Ac $\alpha$ 2-6(Gal $\beta$ 1-3)GalNAc $\alpha$ -sp3    | -           |
| 290 | Neu5Ac $\alpha$ 2-6(Gal $\alpha$ 1-3)GalNAc $\alpha$ -sp3   | -           |
| 291 | Neu5Ac $\beta$ 2-6(Gal $\beta$ 1-3)GalNAc $\alpha$ -sp3     | -           |
| 292 | Neu5Ac $\alpha$ 2-3Gal $\beta$ 1-3GalNAc $\alpha$ -sp3      | -           |



|     |                                                                                                                                                   |                    |
|-----|---------------------------------------------------------------------------------------------------------------------------------------------------|--------------------|
| 293 | Neu5Ac $\alpha$ 2-3Gal $\beta$ 1-4Glc $\beta$ -sp3                                                                                                | 3'SL               |
| 294 | Neu5Ac $\alpha$ 2-3Gal $\beta$ 1-4Glc $\beta$ -sp4                                                                                                | 3'SL               |
| 295 | Neu5Ac $\alpha$ 2-6Gal $\beta$ 1-4Glc $\beta$ -sp2                                                                                                | 6'SL               |
| 297 | Neu5Ac $\beta$ 2-6Gal $\beta$ 1-4Glc $\beta$ -sp2                                                                                                 | -                  |
| 298 | Neu5Ac $\alpha$ 2-3Gal $\beta$ 1-4GlcNAc $\beta$ -sp3                                                                                             | 3'SLN              |
| 299 | Neu5Ac $\alpha$ 2-3Gal $\beta$ 1-3GlcNAc $\beta$ -sp3                                                                                             | 3'SiaLeC           |
| 300 | Neu5Ac $\alpha$ 2-6Gal $\beta$ 1-4GlcNAc $\beta$ -sp3                                                                                             | 6'SLN              |
| 302 | Neu5Ac $\beta$ 2-6Gal $\beta$ 1-4GlcNAc $\beta$ -sp3                                                                                              | -                  |
| 303 | Neu5Gc $\alpha$ 2-3Gal $\beta$ 1-4GlcNAc $\beta$ -sp3                                                                                             | -                  |
| 304 | Neu5Gc $\alpha$ 2-6Gal $\beta$ 1-4GlcNAc $\beta$ -sp3                                                                                             | -                  |
| 305 | Neu5Gc $\beta$ 2-6Gal $\beta$ 1-4GlcNAc $\beta$ -sp3                                                                                              | -                  |
| 309 | Neu5Ac $\alpha$ 2-6(Neu5Ac $\alpha$ 2-3)GalNAc $\alpha$ -sp3                                                                                      | -                  |
| 310 | Neu5Ac $\alpha$ 2-3Gal $\beta$ 1-4GlcNAc $\beta$ -O(CH <sub>2</sub> ) <sub>3</sub> NH-amide-Neu5Ac $\alpha$ 2-3Gal $\beta$ 1-4GlcNAc $\beta$ -sp3 | -                  |
| 315 | Neu5Ac $\alpha$ 2-3Gal $\beta$ 1-4-(6-O-Su)GlcNAc $\beta$ -sp3                                                                                    | -                  |
| 316 | Fuc $\alpha$ 1-2(6-O-Su)Gal $\beta$ 1-4GlcNAc $\beta$ -sp3                                                                                        | 6'-suH(type2)      |
| 318 | Neu5Ac $\alpha$ 2-6Gal $\beta$ 1-4(6-O-Su)GlcNAc $\beta$ -sp3                                                                                     | -                  |
| 319 | Neu5Ac $\alpha$ 2-3(6-O-Su)Gal $\beta$ 1-4GlcNAc $\beta$ -sp3                                                                                     | -                  |
| 320 | 4-O-Su-Neu5Ac $\alpha$ 2-3(6-O-Su)Gal $\beta$ 1-4GlcNAc $\beta$ -sp3                                                                              | -                  |
| 321 | (Neu5Ac $\alpha$ 2-8) <sub>3</sub> -sp3                                                                                                           | (Sia) <sub>3</sub> |
| 322 | (Neu5Ac $\alpha$ 2-8) <sub>3b</sub> -sp3                                                                                                          | -                  |
| 323 | Neu5Ac $\alpha$ 2-6Gal $\beta$ 1-3GlcNAc $\beta$ -sp3                                                                                             | 6'-SiaLec          |
| 324 | Neu5Ac $\alpha$ 2-6Gal $\beta$ 1-3(6-O-Su)GlcNAc $\beta$ -sp3                                                                                     | -                  |
| 326 | Neu5Ac $\alpha$ 2-3Gal $\beta$ 1-4Glc $\beta$ -sp4-Ile                                                                                            | -                  |
| 327 | Neu5Ac $\alpha$ 2-3Gal $\beta$ 1-4Glc $\beta$ -sp4-Nle                                                                                            | -                  |
| 328 | Neu5Ac $\alpha$ 2-3Gal $\beta$ 1-4Glc $\beta$ -sp4-Phe                                                                                            | -                  |
| 329 | Neu5Ac $\alpha$ 2-3Gal $\beta$ 1-4Glc $\beta$ -sp4-Trp                                                                                            | -                  |
| 331 | Neu5Gc $\alpha$ 2-3Gal $\beta$ 1-3GlcNAc $\beta$ -sp3                                                                                             | -                  |
| 333 | Neu5Gc $\alpha$ 2-3Gal $\beta$ 1-3(6-O-Su)GlcNAc $\beta$ -sp3                                                                                     | -                  |
| 334 | Neu5Gc $\alpha$ 2-3Gal $\beta$ 1-4(6-O-Su)GlcNAc $\beta$ -sp3                                                                                     | -                  |
| 335 | Neu5Ac $\alpha$ 2-3Gal $\beta$ 1-3(6-O-Su)GlcNAc $\beta$ -sp3                                                                                     | -                  |

|     |                                                                        |                               |
|-----|------------------------------------------------------------------------|-------------------------------|
| 337 | GalNAc $\alpha$ 1-4Gal $\beta$ 1-4GlcNAc $\beta$ -sp3                  | -                             |
| 338 | Neu5Ac $\alpha$ 2-6Gal $\beta$ 1-3GalNAc $\alpha$ -sp3                 | 6'-sialyl-TF                  |
| 339 | Neu5Ac $\beta$ 2-6Gal $\beta$ 1-3GalNAc $\alpha$ -sp3                  | -                             |
| 340 | Gal $\alpha$ 1-3(Neu5Ac $\beta$ 2-6)GalNAc $\beta$ -sp3                | -                             |
| 342 | Neu5Ac $\alpha$ 2-3(6-O-Su)Gal $\beta$ 1-3GalNAc $\alpha$ -sp3         | 6'Su3'SiaTF                   |
| 344 | Neu5Ac $\beta$ 2-3Gal $\beta$ 1-4GlcNAc $\beta$ -sp3                   | b3'SLN                        |
| 345 | Neu5Ac $\alpha$ 2-3Gal $\beta$ 1-3(6-O-Su)GalNAc $\alpha$ -sp3         | -                             |
| 346 | Neu5Ac $\alpha$ 2-3-(6-O-Su)Gal $\beta$ 1-4(6-O-Su)GlcNAc $\beta$ -sp3 | -                             |
| 347 | Gal $\beta$ 1-4(Neu5Ac $\alpha$ 2-6)GlcNAc $\beta$ -sp2                | -                             |
| 348 | Neu5Ac $\alpha$ 2-3Gal $\beta$ 1-4Glc $\alpha$ -sp3                    | -                             |
| 349 | Neu5Ac $\alpha$ 2-3(Neu5Ac $\alpha$ 2-2)Gal $\beta$ -sp3               | -                             |
| 350 | Neu5Gc $\alpha$ 2-3Gal $\beta$ 1-4Glc $\beta$ -sp3                     | 3'SL(Gc)                      |
| 359 | Gal $\alpha$ 1-3(Fuca1-2)Gal $\beta$ 1-3GlcNAc $\beta$ -sp3            | B (type 1)                    |
| 360 | Gal $\alpha$ 1-3(Fuca1-2)Gal $\beta$ 1-4GlcNAc $\beta$ -sp3            | B (type 2)                    |
| 362 | Gal $\alpha$ 1-3(Fuca1-2)Gal $\beta$ 1-3GalNAc $\alpha$ -sp3           | B (type 3)                    |
| 363 | Gal $\alpha$ 1-3(Fuca1-2)Gal $\beta$ 1-3GalNAc $\beta$ -sp3            | B (type 4)                    |
| 364 | Gal $\alpha$ 1-3Gal $\beta$ 1-4(Fuca1-3)GlcNAc $\beta$ -sp3            | $\alpha$ GalLex               |
| 365 | Gal $\alpha$ 1-4(Fuca1-2)Gal $\beta$ 1-4GlcNAc $\beta$ -sp3            | -                             |
| 366 | GalNAc $\alpha$ 1-3(Fuca1-2)Gal $\beta$ 1-3GlcNAc $\beta$ -sp3         | A (type 1)                    |
| 368 | GalNAc $\alpha$ 1-3(Fuca1-2)Gal $\beta$ 1-4GlcNAc $\beta$ -sp3         | A (type 2)                    |
| 369 | GalNAc $\alpha$ 1-4(Fuca1-2)Gal $\beta$ 1-4GlcNAc $\beta$ -sp3         | -                             |
| 370 | GalNAc $\beta$ 1-3(Fuca1-2)Gal $\beta$ 1-4GlcNAc $\beta$ -sp3          | -                             |
| 371 | Fuca1-2Gal $\beta$ 1-3(Fuca1-4)GlcNAc $\beta$ -sp3                     | Leb                           |
| 372 | Fuca1-2Gal $\beta$ 1-4(Fuca1-3)GlcNAc $\beta$ -sp3                     | Ley                           |
| 373 | Gal $\alpha$ 1-3Gal $\beta$ 1-4GlcNAc $\beta$ 1-3Gal $\beta$ -sp3      | Galili (tetra)                |
| 374 | Gal $\alpha$ 1-3(Gal $\alpha$ 1-4)Gal $\beta$ 1-4GlcNAc $\beta$ -sp3   | -                             |
| 375 | Gal $\alpha$ 1-4GlcNAc $\beta$ 1-3Gal $\beta$ 1-4GlcNAc $\beta$ -sp3   | -                             |
| 376 | Gal $\beta$ 1-3GlcNAc $\beta$ 1-3Gal $\beta$ 1-4Glc $\beta$ -sp4       | N-acetyllacto-N-tetraose, LNT |
| 377 | Gal $\beta$ 1-3GlcNAc $\beta$ 1-3Gal $\beta$ 1-3GlcNAc $\beta$ -sp2    | -                             |
| 378 | Gal $\beta$ 1-3GlcNAc $\alpha$ 1-3Gal $\beta$ 1-4GlcNAc $\beta$ -sp3   | -                             |

|     |                                                                                  |                                  |
|-----|----------------------------------------------------------------------------------|----------------------------------|
| 379 | Gal $\beta$ 1-3GlcNAc $\beta$ 1-3Gal $\beta$ 1-4GlcNAc $\beta$ -sp3              | -                                |
| 380 | Gal $\beta$ 1-3GlcNAc $\alpha$ 1-6Gal $\beta$ 1-4GlcNAc $\beta$ -sp2             | -                                |
| 381 | Gal $\beta$ 1-3GlcNAc $\beta$ 1-6Gal $\beta$ 1-4GlcNAc $\beta$ -sp2              | -                                |
| 383 | Gal $\beta$ 1-4GlcNAc $\beta$ 1-3Gal $\beta$ 1-4Glc $\beta$ -sp4                 | N-acetyllacto-neo-tetraose, LNnT |
| 384 | Gal $\beta$ 1-4GlcNAc $\beta$ 1-3Gal $\beta$ 1-4GlcNAc $\beta$ -sp2              | i                                |
| 386 | Gal $\beta$ 1-4GlcNAc $\alpha$ 1-6Gal $\beta$ 1-4GlcNAc $\beta$ -sp2             | -                                |
| 387 | Gal $\beta$ 1-4GlcNAc $\beta$ 1-6Gal $\beta$ 1-4GlcNAc $\beta$ -sp2              | -                                |
| 388 | Gal $\beta$ 1-4GlcNAc $\beta$ 1-6(Gal $\beta$ 1-3)GalNAc $\alpha$ -sp3           | -                                |
| 389 | GalNAc $\beta$ 1-3Gal $\alpha$ 1-4Gal $\beta$ 1-4Glc $\beta$ -sp3                | Gb4, P                           |
| 390 | (Glc $\alpha$ 1-4)4b-sp4                                                         | maltotetraose                    |
| 392 | GalNAc $\alpha$ 1-3(Fuca $\alpha$ 1-2)Gal $\beta$ 1-3GalNAc $\alpha$ -sp3        | A (type 3)                       |
| 395 | GlcNAc $\beta$ 1-6(GlcNAc $\beta$ 1-3)Gal $\beta$ 1-4GlcNAc $\beta$ -sp2         | Tk                               |
| 396 | (GlcNAc $\beta$ 1)3-3,4,6-GalNAc $\alpha$ -sp3                                   | -                                |
| 401 | Gal $\beta$ 1-3GlcNAc $\beta$ 1-3Gal $\beta$ 1-3GlcNAc $\beta$ -sp3              | -                                |
| 402 | GalNAc $\alpha$ 1-3(Fuca $\alpha$ 1-2)Gal $\alpha$ 1-4GlcNAc $\beta$ -sp3        | -                                |
| 403 | Gal $\beta$ 1-3GlcNAc $\beta$ 1-3Gal $\beta$ 1-4GlcNAc $\beta$ -sp2              | -                                |
| 404 | GalNAc $\alpha$ 1-3Gal $\beta$ 1-4(Fuca $\alpha$ 1-3)GlcNAc $\beta$ -sp3         | $\alpha$ GalNAcLex               |
| 405 | Gal $\alpha$ 1-3(Fuca $\alpha$ 1-2)Gal $\alpha$ 1-4GlcNAc $\beta$ -sp3           | -                                |
| 408 | GlcNAc $\beta$ 1-4(GlcNAc $\beta$ 1-3)Gal $\beta$ 1-4GlcNAc $\beta$ -sp3         | GlcNAc2-3,4LacNAc                |
| 409 | GlcNAc $\beta$ 1-3(GlcNAc $\alpha$ 1-6)Gal $\beta$ 1-4GlcNAc $\beta$ -sp2        | -                                |
| 410 | Gal $\beta$ 1-3GlcNAc $\alpha$ 1-3Gal $\beta$ 1-3GlcNAc $\beta$ -sp3             | -                                |
| 411 | Gal $\beta$ 1-4GlcNAc $\alpha$ 1-3Gal $\beta$ 1-4GlcNAc $\beta$ -sp3             | -                                |
| 419 | 3-O-SuGal $\beta$ 1-4GlcNAc $\beta$ 1-3Gal $\beta$ 1-4GlcNAc $\beta$ -sp3        | -                                |
| 420 | 4-O-SuGal $\beta$ 1-4GlcNAc $\beta$ 1-3Gal $\beta$ 1-4GlcNAc $\beta$ -sp3        | -                                |
| 421 | Gal $\beta$ 1-3GlcNAc $\beta$ 1-3Gal $\beta$ 1-4Glc $\alpha$ -sp4                | -                                |
| 423 | Neu5Ac $\alpha$ 2-3Gal $\beta$ 1-4(Fuca $\alpha$ 1-3)GlcNAc $\beta$ -sp3         | SiaLex                           |
| 425 | Neu5Ac $\alpha$ 2-3Gal $\beta$ 1-4(Fuc $\beta$ 1-3)GlcNAc $\beta$ -sp3           | -                                |
| 426 | Neu5Ac $\alpha$ 2-3Gal $\beta$ 1-3(Fuca $\alpha$ 1-4)GlcNAc $\beta$ -sp3         | SiaLea                           |
| 428 | Neu5Ac $\alpha$ 2-3Gal $\beta$ 1-4(Fuca $\alpha$ 1-3)(6-O-Su)GlcNAc $\beta$ -sp3 | 6-O-Su-SiaLex                    |
| 429 | Neu5Ac $\alpha$ 2-3(6-O-Su)Gal $\beta$ 1-4(Fuca $\alpha$ 1-3)GlcNAc $\beta$ -sp3 | 6'-O-Su-SiaLex                   |

|     |                                                                                                        |                  |
|-----|--------------------------------------------------------------------------------------------------------|------------------|
| 431 | Neu5Ac $\alpha$ 2-3Gal $\beta$ 1-4(2-O-Su-Fuc $\alpha$ 1-3)GlcNAc $\beta$ -sp3                         | -                |
| 432 | Neu5Ac $\alpha$ 2-3Gal $\beta$ 1-4(3-O-Su-Fuc $\alpha$ 1-3)GlcNAc $\beta$ -sp3                         | -                |
| 434 | Neu5Ac $\alpha$ 2-8Neu5Ac $\alpha$ 2-3Gal $\beta$ 1-4Glc $\beta$ -sp4                                  | GD3              |
| 435 | Neu5Ac $\alpha$ 2-3Gal $\beta$ 1-4(2-O-Su-Fuc $\alpha$ 1-3)(6-O-Su)GlcNAc $\beta$ -sp3                 | -                |
| 436 | 4-O-Su-Neu5Ac $\alpha$ 2-3(6-O-Su)Gal $\beta$ 1-4(Fuc $\alpha$ 1-3)GlcNAc $\beta$ -sp3                 | -                |
| 437 | GalNAc $\alpha$ 1-3(Fuc $\alpha$ 1-2)Gal $\beta$ 1-3GalNAc $\beta$ -sp3                                | A(type 4)        |
| 438 | Fuc $\beta$ 1-2Gal $\beta$ 1-4(Fuc $\alpha$ 1-3)GlcNAc $\beta$ -sp3                                    | -                |
| 441 | Neu5Ac $\alpha$ 2-6(Fuc $\alpha$ 1-2)Gal $\beta$ 1-4GlcNAc $\beta$ -sp3                                | -                |
| 442 | Neu5Ac $\alpha$ 2-3(GalNAc $\beta$ 1-4)Gal $\beta$ 1-4Glc $\beta$ -sp4                                 | GM2              |
| 479 | Fuc $\alpha$ 1-2Gal $\beta$ 1-3GlcNAc $\beta$ 1-3Gal $\beta$ 1-4Glc $\beta$ -sp4                       | H(type1), LNFP I |
| 481 | Gal $\alpha$ 1-3Gal $\beta$ 1-4GlcNAc $\beta$ 1-3Gal $\beta$ 1-4Glc $\beta$ -sp4                       | Galili (penta)   |
| 482 | Gal $\alpha$ 1-3(Fuc $\alpha$ 1-2)Gal $\beta$ 1-3(Fuc $\alpha$ 1-4)GlcNAc $\beta$ -sp3                 | BLeb             |
| 483 | Gal $\alpha$ 1-3(Fuc $\alpha$ 1-2)Gal $\beta$ 1-4(Fuc $\alpha$ 1-3)GlcNAc $\beta$ -sp3                 | BLey             |
| 485 | Gal $\beta$ 1-4GalNAc $\alpha$ 1-3(Fuc $\alpha$ 1-2)Gal $\beta$ 1-4GlcNAc $\beta$ -sp3                 | -                |
| 488 | Gal $\beta$ 1-4GlcNAc $\beta$ 1-6(Gal $\beta$ 1-4GlcNAc $\beta$ 1-3)GalNAc $\alpha$ -sp3               | -                |
| 489 | Gal $\beta$ 1-4GlcNAc $\beta$ 1-3(GlcNAc $\beta$ 1-6)Gal $\beta$ 1-4GlcNAc $\beta$ -sp2                | -                |
| 491 | GalNAc $\alpha$ 1-3(Fuc $\alpha$ 1-2)Gal $\beta$ 1-4(Fuc $\alpha$ 1-3)GlcNAc $\beta$ -sp3              | ALey             |
| 492 | (Glc $\alpha$ 1-6)5b-sp4                                                                               | isomaltopentaose |
| 493 | (GlcNAc $\beta$ 1-4)5b-sp4                                                                             | chitopentaose    |
| 495 | Man $\alpha$ 1-6(Man $\alpha$ 1-3)Man $\alpha$ 1-6(Man $\alpha$ 1-3)Man $\beta$ -sp4                   | Man5             |
| 496 | Fuc $\alpha$ 1-2Gal $\beta$ 1-3(Fuc $\alpha$ 1-4)GlcNAc $\beta$ 1-3Gal $\beta$ 1-4Glc $\beta$ -sp4     | Leb(hexa)        |
| 498 | Gal $\beta$ 1-4GlcNAc $\beta$ 1-3Gal $\beta$ 1-4GlcNAc $\beta$ 1-3Gal $\beta$ 1-4GlcNAc $\beta$ -sp3   | (LN)3            |
| 499 | Gal $\beta$ 1-4GlcNAc $\beta$ 1-6(Gal $\beta$ 1-4GlcNAc $\beta$ 1-3)Gal $\beta$ 1-4GlcNAc $\beta$ -sp2 | I                |
| 501 | Gal $\beta$ 1-3GalNAc $\beta$ 1-3Gal $\alpha$ 1-4Gal $\beta$ 1-4Glc $\beta$ -sp4                       | Gb5              |
| 502 | (Glc $\alpha$ 1-6)6b-sp4                                                                               | isomaltohexaose  |
| 503 | (GlcNAc $\beta$ 1-4)6-sp4                                                                              | chitohexaose     |
| 504 | (A $\beta$ 1-4GN $\beta$ 1-2M $\alpha$ 1)2-3,6-M $\beta$ 1-4GN $\beta$ 1-4GN $\beta$ -sp4              | -                |
| 505 | (GN $\beta$ 1-2M $\alpha$ 1)2-3,6-M $\beta$ 1-4GN $\beta$ 1-4GN $\beta$ -sp4                           | -                |
| 508 | GalNAc $\beta$ 1-3(Fuc $\alpha$ 1-2)Gal $\beta$ 1-4(Fuc $\alpha$ 1-3)GlcNAc $\beta$ -sp3               | -                |
| 511 | GalNAc $\alpha$ 1-3GalNAc $\beta$ 1-3Gal $\alpha$ 1-4Gal $\beta$ 1-4Glc $\beta$ -sp4                   | Fs-5-Gly         |

|     |                                                                                                                                         |                 |
|-----|-----------------------------------------------------------------------------------------------------------------------------------------|-----------------|
| 512 | GalNAc $\alpha$ 1-3Gal $\beta$ 1-4GlcNAc $\alpha$ 1-3Gal $\beta$ 1-4GlcNAc $\beta$ -sp3                                                 | -               |
| 513 | Glc $\alpha$ 1-4Glc $\alpha$ 1-4Glc $\alpha$ 1-4Glc $\alpha$ 1-4Glc $\alpha$ 1-4Glc $\beta$ -sp4                                        | maltohexaose    |
| 528 | Neu5Ac $\alpha$ 2-3Gal $\beta$ 1-4(Fuc $\alpha$ 1-3)GlcNAc $\beta$ 1-3Gal $\beta$ -sp3                                                  | SiaLex-Gal      |
| 534 | Neu5Ac $\alpha$ 2-6Gal $\beta$ 1-4GlcNAc $\beta$ 1-3Gal $\beta$ 1-4GlcNAc $\beta$ -sp3                                                  | -               |
| 535 | Neu5Ac $\alpha$ 2-8Neu5Ac $\alpha$ 2-3(GalNAc $\beta$ 1-4)Gal $\beta$ 1-4Glc $\beta$ -sp4                                               | GD2             |
| 536 | Neu5Aa2-3Gal $\beta$ 1-3GlcNAc $\beta$ 1-3Gal $\beta$ 1-4Glc $\beta$ -sp4                                                               | LSTa            |
| 537 | Neu5Aa2-3Gal $\beta$ 1-4GlcNAc $\beta$ 1-3Gal $\beta$ 1-4Glc $\beta$ -sp4                                                               | LSTd            |
| 539 | Gal $\beta$ 1-4GlcNAc $\beta$ 1-6(Fuc $\alpha$ 1-2Gal $\beta$ 1-3GlcNAc $\beta$ 1-3)Gal $\beta$ 1-4Glc $\beta$ -sp4                     | MFLNH I         |
| 627 | (Sia $\alpha$ 2-6A $\beta$ 1-4GN $\beta$ 1-2M $\alpha$ 1)2-3,6-M $\beta$ 1-4GN $\beta$ 1-4GN $\beta$ -sp4                               | 11-OS, YDS      |
| 629 | Trehalose-ethanolamine                                                                                                                  | -               |
| 630 | (GlcA $\beta$ 1-3GlcNAc $\beta$ 1-4) <sub>20</sub> -NH(p-C <sub>6</sub> H <sub>4</sub> )CH <sub>2</sub> CH <sub>2</sub> NH <sub>2</sub> | hyaluronic acid |
| 631 | (GlcA $\beta$ 1-3GlcNAc $\beta$ 1-4) <sub>38</sub> -NH(p-C <sub>6</sub> H <sub>4</sub> )CH <sub>2</sub> CH <sub>2</sub> NH <sub>2</sub> | hyaluronic acid |
| 632 | (GlcA $\beta$ 1-3GlcNAc $\beta$ 1-4) <sub>13</sub> -NH(p-C <sub>6</sub> H <sub>4</sub> )CH <sub>2</sub> CH <sub>2</sub> NH <sub>2</sub> | hyaluronic acid |
| 633 | (Neu5Ac $\alpha$ 2-8) <sub>n</sub> -NH(p-C <sub>6</sub> H <sub>4</sub> )CH <sub>2</sub> CH <sub>2</sub> NH <sub>2</sub>                 | colominic acid  |
| 800 | GlcNAc $\alpha$ 1-4GlcNAc $\beta$ -sp3                                                                                                  | -               |
| 802 | Gal $\beta$ 1-3GalNAc(fur)b-sp3                                                                                                         | -               |
| 804 | [Gal $\beta$ 1-4GlcNAc $\beta$ -OCH <sub>2</sub> CH <sub>2</sub> ] <sub>2</sub> NH                                                      | -               |
| 805 | GalNAc $\beta$ 1-4(6-O-Bn)GlcNAc $\beta$ -sp3                                                                                           | -               |
| 806 | Gal $\alpha$ 1-6Glc $\alpha$ -sp3                                                                                                       | -               |
| 808 | Gal $\alpha$ 1-6Glc $\beta$ -sp3                                                                                                        | melibiose       |
| 809 | GalNAc $\beta$ 1-3GalNAc $\alpha$ -sp3                                                                                                  | -               |
| 810 | GalNGc $\alpha$ 1-3GalNAc $\alpha$ -sp3                                                                                                 | -               |
| 811 | 3,6-O-Me2-Glc $\beta$ 1-4(2,3-O-Me2)Rha $\beta$ -O(p-C <sub>6</sub> H <sub>4</sub> )CH <sub>2</sub> CH <sub>2</sub> NH <sub>2</sub>     | -               |
| 812 | Gal $\beta$ 1-4Glc $\alpha$ -sp4                                                                                                        | -               |
| 813 | Gal $\beta$ 1-3GalNGc $\alpha$ -sp3                                                                                                     | -               |
| 814 | Man $\alpha$ 1-6Man $\alpha$ -sp4                                                                                                       | -               |
| 815 | Gal $\alpha$ 1-4GalNAc $\alpha$ -sp3                                                                                                    | -               |
| 816 | Gal $\beta$ 1-4GalNAc $\alpha$ -sp3                                                                                                     | -               |
| 817 | GalNAc $\beta$ 1-4GalNAc $\alpha$ -sp3                                                                                                  | -               |
| 818 | GalNAc $\alpha$ 1-4GalNAc $\alpha$ -sp3                                                                                                 | -               |

|     |                                                       |        |
|-----|-------------------------------------------------------|--------|
| 819 | Glcβ1-4GalNAcα-sp3                                    | -      |
| 820 | GlcNAcβ1-4GalNAcα-sp3                                 | -      |
| 821 | Galα1-4Galβ-sp3                                       | -      |
| 822 | GalNAcα1-4Galβ-sp3                                    | -      |
| 823 | GalNAcβ1-4Galβ-sp3                                    | -      |
| 824 | Galβ1-4Galβ-sp3                                       | -      |
| 825 | Glcβ1-3GlcNAcβ-sp3                                    | -      |
| 826 | Glcβ1-3GalNAcα-sp3                                    | -      |
| 827 | Glcβ1-3GalNAcβ-sp3                                    | -      |
| 828 | GlcNAcβ1-2Galβ-sp3                                    | -      |
| 829 | GlcNAcβ1-4Galβ-sp3                                    | -      |
| 830 | Glcα1-4GalNAcα-sp3                                    | -      |
| 831 | Galβ1-4Glcβ-sp3                                       | -      |
| 832 | Galβ1-4Glcβ-sp4-Leu                                   | -      |
| 833 | Galβ1-4Glcβ-sp4-Leu-Leu                               | -      |
| 834 | Galβ1-4Glcβ-sp4-Leu-Tyr                               | -      |
| 835 | Galβ1-4Glcβ-sp4-Leu-Phe                               | -      |
| 836 | GlcNAcα1-3Galβ-sp3                                    | -      |
| 837 | Glcβ1-3Galβ-sp3                                       | -      |
| 838 | Glcβ1-6Galβ-sp3                                       | -      |
| 839 | GlcNAcβ1-3Galβ-sp3                                    | -      |
| 840 | Galβ1-4Glcα-sp3                                       | -      |
| 841 | Galα1-4Glcβ-sp3                                       | -      |
| 842 | Galα1-4Glcα-sp3                                       | -      |
| 843 | Galβ1-3GlcNAcα-sp3                                    | -      |
| 850 | Galβ1-3(6-O-Su)GalNAcα-sp3                            | 6-suTF |
| 851 | Galα1-3(6-O-Su)GalNAcα-sp3                            | -      |
| 852 | GlcNAcβ1-4-[HOOC(CH <sub>3</sub> )CH]-3-O-GlcNAcα-sp4 | -      |
| 853 | 6-O-Su-Galα1-3GalNAcα-sp3                             | -      |
| 854 | Neu5Acα2-3(6-O-Su)Galβ-sp3                            | -      |

|     |                                                                                                  |   |
|-----|--------------------------------------------------------------------------------------------------|---|
| 855 | (O-Su)4Glc $\alpha$ 1-4(O-Su)3Glc $\beta$ -spacer                                                | - |
| 856 | DGlcA $\beta$ 1-6Gal $\beta$ -sp3                                                                | - |
| 857 | Neu5Ac $\alpha$ 2-8Neu5Ac $\beta$ -sp3                                                           | - |
| 858 | Gal $\beta$ 1-4(6-O-Su)Glc $\beta$ -sp3                                                          | - |
| 859 | Estrone-3-GlcA(PEG-NH <sub>2</sub> )b                                                            | - |
| 900 | H-(Gly) <sub>6</sub> -NH <sub>2</sub> Gly <sub>6</sub> -amide, linear                            | - |
| 901 | biot-CMG <sub>2</sub> -NH <sub>2</sub>                                                           | - |
| 908 | PEKAXRELC                                                                                        | - |
| 909 | VMYAXSGC                                                                                         | - |
| 910 | Npentyl-Indol-linked-3-NH <sub>2</sub> (AcOH salt)                                               | - |
| 911 | N-C5-indazole-3-CONH-PEG-NH <sub>2</sub> (AcOH salt)                                             | - |
| 912 | APPA(Tn)TSGPAPRTDPASTVGHAP-sp12                                                                  | - |
| 913 | APPAT(Lac)YGPAPRTDPASTVGHAP-sp12                                                                 | - |
| 914 | APPATSGPAPRTDPASTVGHAP-sp12                                                                      | - |
| 915 | APPAT(Tn)SGPAPRTDPASTVGHAPPATSG-sp12                                                             | - |
| 916 | APPAT(SiaTn)SGPAPRTDPASTVGHAP-PEG3-EDAGVPLSVTRVFSGYAFES-PEG3-NH- Ethoxy-cyclobutene-1,2-dione    | - |
| 917 | APPAT(Tn)SGPAPR(Tn)TDPASTVGHAP-PEG3-NH- Ethoxy-cyclobutene-1,2-dione                             | - |
| 918 | APPAT(Tn)SGPAPR(Tn)TDPASTVGHAP-PEG3-K-PEG3-TALVVDDGVLNEENV-PEG3-NH- Ethoxy-cyclobutene-1,2-dione | - |
| 919 | APPAT(Tn)SGPAPR(Tn)TDPASTVGHAP-sp12                                                              | - |
| 920 | CVKADRPIAISPGEA                                                                                  | - |
| 921 | CVIKEGKDENQGIGYL                                                                                 | - |
| 922 | CDKVVSISNSNDDRGL                                                                                 | - |
| 923 | CSFDENLQSSPKDRIN                                                                                 | - |
| 925 | QRNDGKTRDTNPKC                                                                                   | - |
| 926 | CTDAIGPEAEGAKK                                                                                   | - |
| 927 | KEEAEEKAEQRALLC                                                                                  | - |
| 928 | CGGRSPKSMNEEGASR                                                                                 | - |
| 929 | CALQSAKTQKASSDLA                                                                                 | - |

|      |                                                                           |                              |
|------|---------------------------------------------------------------------------|------------------------------|
| 931  | CMG <sub>2</sub> diamine, 2Na-salt                                        | -                            |
| 932  | DLEGKQXNFKNLREFC                                                          | CoV2-178                     |
| 933  | KSNLKPFXDISTEIC                                                           | CoV2-458                     |
| 934  | DPSKPSKRXFIEDLLC                                                          | CoV2-808                     |
| 935  | CSFKEELXKYFKNHTS                                                          | CoV12-1147                   |
| 936  | CKFDEDXSEPVLKGVK                                                          | CoV12-1255                   |
| 937  | DLEGKQXNFKNLREFC -PAA(5%)                                                 | CoV2-178-PA5                 |
| 938  | KSNLKPFXDISTEIC -PAA(5%)                                                  | CoV2-458-PA5                 |
| 939  | DPSKPSKRXFIEDLLC -PAA(5%)                                                 | CoV2-808-PA5                 |
| 940  | CSFKEELXKYFKNHTS -PAA(5%)                                                 | CoV12-1147-PA5               |
| 941  | CKFDEDXSEPVLKGVK --PAA(5%)                                                | CoV12-1255-PA5               |
| 942  | DLEGKQGNFKNLREFC-PAA(10%)                                                 | CoV2-178-PA10                |
| 943  | KSNLKPFXDISTEIC-PAA(10%)                                                  | CoV2-458-PA10                |
| 944  | DPSKPSKRXFIEDLLC -PAA(10%)                                                | CoV2-808-PA10                |
| 945  | CSFKEELXKYFKNHTS -PAA10%)                                                 | CoV12-1147-PA10              |
| 946  | CKFDEDXSEPVLKGVK --PAA(10%)                                               | CoV12-1255-PA10              |
| 947  | PAA (5%)                                                                  | K/PA5                        |
| 948  | PAA(10%)                                                                  | K/PA10                       |
| 949  | PLQSYGXPTNGVGYC                                                           | CoV2-495                     |
| 950  | PLQSYGXPTNGVGYHHHC                                                        | CoV2-495H                    |
| 951  | EVRQIAPGQTXKIADC                                                          | CoV2-EVR                     |
| 952  | FGAGAALXIPFAMQMC                                                          | CoV2-888                     |
| 953  | FGAGAALQIPFAMXMHHHC                                                       | CoV2-888H                    |
| 1001 | -4Qui3Nα1-3Rhaα1-4Galβ1-3(Glcβ1-4)GalNα1-                                 | Salmonella enterica O28-deAc |
| 1002 | -2Rib-ol5-P-6Galα1-3FucNAα1-3GlcNβ1-                                      | Salmonella enterica O47-deAc |
| 1003 | -4(Fuca1-3)GalNα1-6ManNα1-3Fuca1-3(Glcβ1-4)Galβ1-                         | Salmonella enterica O16-deAc |
| 1004 | -2Fuca1-2Galβ1-3GalNAα1-3GlcNAα1-                                         | Salmonella enterica O13      |
| 1005 | -4Qui3NAα1-3Rhaα1-4Galβ1-3(Glcβ1-4)GalNAα1-                               | Salmonella enterica O28      |
| 1006 | -4(Fuca1-3)GalNAα1-6Man2(20%)Ac3(40%)Ac4(20%)Acα1-3Fuca1-3(Glcβ1-4)Galβ1- | Salmonella enterica O16      |
| 1007 | -2(Galfα1-4)Galα1-3ManNAcβ1-6Galfβ1-3GlcNAcβ1-                            | Salmonella enterica O17      |



|      |                                                                                                                                  |                                |
|------|----------------------------------------------------------------------------------------------------------------------------------|--------------------------------|
| 1008 | -3Gal $\beta$ 2(30%)Ac $\beta$ 1-3Gal $\alpha$ 1-                                                                                | Salmonella enterica O67        |
| 1009 | -3(S-3HOBu1-2Ala1-4)Qui4N $\beta$ 1-6GlcNAc $\alpha$ 1-3QuiNAc $\alpha$ 1-3GlcNAc $\alpha$ 1-                                    | Salmonella enterica O58        |
| 1010 | -2Man $\beta$ 1-4Glc $\alpha$ 1-3QuiNAc $\alpha$ 1-3GlcNAc $\alpha$ 1-                                                           | Salmonella enterica O41        |
| 1011 | -3(GalNAcA6NH2 $\alpha$ 1-2)Rha $\alpha$ 1-2Rha $\alpha$ 1-3Rha $\alpha$ 1-2Rha $\alpha$ 1-3GlcNAc $\beta$ 1-                    | Salmonella enterica O62        |
| 1012 | -2(Fuc3NFoa1-3)Man $\beta$ 1-3Glc $\beta$ 1-3GlcNAc $\beta$ 1-                                                                   | Salmonella enterica O60        |
| 1013 | -4Man $\alpha$ 1-2Man $\alpha$ 1-2Man $\beta$ 1-3GalNAc $\alpha$ 1-                                                              | Salmonella enterica O18        |
| 1014 | -2Gal $\beta$ 1-3GlcNAc $\alpha$ 1-4Rha $\alpha$ 1-3GlcNAc $\beta$ 1-                                                            | Salmonella enterica O59        |
| 1015 | -3(ManNAc $\beta$ 1-2)Rha $\alpha$ 1-2Rha $\alpha$ 1-2Gal $\alpha$ 1-3GlcNAc $\beta$ 1-                                          | Salmonella enterica O42        |
| 1016 | -2Rib $\beta$ 1-4Gal $\beta$ 1-4GlcNAc $\alpha$ 1-4Gal $\beta$ 1-3GlcNAc $\alpha$ 1-                                             | Salmonella enterica O52        |
| 1017 | -3GlcNAc $\beta$ 1-3(Man $\beta$ 1-4)Gal $\alpha$ 1-4Rha $\alpha$ 1-                                                             | Salmonella enterica O11        |
| 1018 | -6Glc $\alpha$ 1-4(GlcNAc $\beta$ 1-3)Gal $\beta$ 1-3GalNAc $\alpha$ 1-3GlcNAc $\beta$ 1-                                        | Salmonella enterica O51        |
| 1019 | -2Glc $\alpha$ 1-6Glc $\alpha$ 1-4(GlcNAc $\beta$ 1-3)Gal $\alpha$ 1-3GlcNAc $\beta$ 1-                                          | Salmonella enterica O44        |
| 1020 | -7Neu5Ac $\alpha$ 2-3FucNA $\alpha$ 1-3GlcNAc6Ac $\beta$ 1-                                                                      | Salmonella enterica O21        |
| 1021 | -3(GlcNAc $\beta$ 1-2)Rha $\alpha$ 1-2Rha $\alpha$ 1-4Glc $\alpha$ 1-3GalNAc $\beta$ 1-                                          | Salmonella enterica O57        |
| 1022 | -3(Ser2Ac1-4)Qui4N $\beta$ 1-3Rib $\beta$ 1-4GalNAc $\alpha$ 1-3GlcNAc $\alpha$ 1-                                               | Salmonella enterica O56        |
| 1023 | -3(Gal $\beta$ 1-4)Gal $\beta$ 1-4(GlcNAc $\beta$ 1-2)Glc $\beta$ 1-3GalNAc $\beta$ 1-                                           | Salmonella enterica O38        |
| 1024 | -3(Rha2(%)Ac3(%)Ac4(%)Ac $\alpha$ 1-4Gal $\alpha$ 1-2)Rha $\alpha$ 1-4Glc $\alpha$ 1-2Rha $\alpha$ 1-3GlcNAc $\beta$ 1-          | Cronobacter sakazakii G2356 O2 |
| 1025 | -3FucNAc $\alpha$ 1-4(GlcNAc $\beta$ 1-2)Gal $\alpha$ 1-3FucNAc $\alpha$ 1-3GlcNAc $\beta$ 1-                                    | Cronobacter sakazakii G2592 O7 |
| 1026 | -2(Glc $\alpha$ 1-4)Glc $\beta$ 1-2Fuc3NRHb $\beta$ 1-6GlcNAc $\alpha$ 1-4GalNAc $\alpha$ 1-3(Glc $\alpha$ 1-6)GlcNAc $\beta$ 1- | Cronobacter sakazakii G2594 O4 |
| 1027 | -4Qui3NAc $\alpha$ 1-3Rha $\alpha$ 1-6GlcNAc $\alpha$ 1-4GlcA $\beta$ 1-3(Glc $\beta$ 1-4)GalNAc $\alpha$ 1-                     | Cronobacter sakazakii G2726 O3 |
| 1201 | -4(Col $\alpha$ 1-3)(Col $\alpha$ 1-6)Glc $\alpha$ 1-4Gal $\alpha$ 1-3GlcNAc $\beta$ 1-                                          | Escherichia coli O11           |
| 1202 | -2Gal $\beta$ 1-3FucNAc $\alpha$ 1-3GlcNAc $\beta$ 1-                                                                            | Escherichia coli O15           |
| 1203 | -2Man $\alpha$ 1-2(Glc $\alpha$ 1-4)Man $\beta$ 1-3GlcNAc $\alpha$ 1-6Man $\alpha$ 1-                                            | Escherichia coli O44           |
| 1204 | -2(S-3HOBu1-4)Qui4N $\alpha$ 1-4GalNAc $\beta$ 1-4Rha $\alpha$ 1-3GlcNAc6(30%)Ac $\beta$ 1-                                      | Escherichia coli O49           |
| 1205 | -3(GlcNAc $\beta$ 1-2)Rha $\alpha$ 1-2Rha $\alpha$ 1-4Glc $\alpha$ 1-3GalNAc $\beta$ 1-                                          | Escherichia coli O51           |
| 1206 | -3Fuc $\beta$ 2(50%)Ac $\beta$ 1-3-6dmanHep $\beta$ 1-                                                                           | Escherichia coli O52           |
| 1207 | -2-DRha4NAc $\alpha$ 1-3Fuca1-4Glc $\beta$ 1-3GalNAc $\alpha$ 1-                                                                 | Escherichia coli O57           |
| 1208 | -4(R-Lac2-3Rhap2Ac $\alpha$ 1-3)Man $\beta$ 1-4Man $\alpha$ 1-3GalNAc $\beta$ 1-                                                 | Escherichia coli O58           |
| 1209 | -4Quip3NAc $\alpha$ 1-3Rha $\alpha$ 1-4Gal $\beta$ 1-3GalNAc $\alpha$ 1-                                                         | Escherichia coli O71           |
| 1210 | -6Man $\alpha$ 1-2(Glc $\alpha$ 1-4)Man $\alpha$ 1-2(Glc $\alpha$ 1-3)Man $\beta$ 1-3GlcNAc $\alpha$ 1-                          | Escherichia coli O73           |

|      |                                                                                                                  |                          |
|------|------------------------------------------------------------------------------------------------------------------|--------------------------|
| 1211 | -2(Galf $\alpha$ 1-4)Gal $\alpha$ 1-3ManNAc $\beta$ 1-6Galfb1-3GlcNAc $\beta$ 1-                                 | Escherichia coli O85     |
| 1212 | -3)Fuca1-3Xlufb1-                                                                                                | Escherichia coli O95     |
| 1213 | -3(Glc $\alpha$ 1-2)Rha $\alpha$ 1-2Rha $\alpha$ 1-2Rha $\alpha$ 1-3(Glc $\alpha$ 1-2)Rha $\alpha$ 1-            | Escherichia coli O99     |
| 1214 | -4-8eLeg5Ac7Ac $\alpha$ 2-6Gal $\alpha$ 1-3FucNAc $\alpha$ 1-3GlcNAc $\alpha$ 1-                                 | Escherichia coli O108    |
| 1215 | -4(GlcpNAc $\beta$ 1-3)GalNAc $\alpha$ 1-2Glc $\alpha$ 1-4L-IdoA $\alpha$ 1-3GalNAc $\beta$ 1-                   | Escherichia coli O112ab  |
| 1216 | -3Rib-ol5-P-6Gal $\alpha$ 1-3FucNAma1-3GlcNAc $\beta$ 1-                                                         | Escherichia coli O118    |
| 1217 | -2(RhaNAc3NFob1-3)Man $\beta$ 1-3Gal $\alpha$ 1-4Rha $\alpha$ 1-3GlcNAc $\alpha$ 1-                              | Escherichia coli O119    |
| 1218 | -3(S-3HOBu1-2DA1-4)Qui4Nb1-6GlcNAc $\alpha$ 1-3LQuiNAc $\alpha$ 1-3GlcNAc6(30%)Ac $\alpha$ 1-                    | Escherichia coli O123    |
| 1219 | -2(Glc $\alpha$ 1-3)Man $\alpha$ 1-3Fuca1-3GalNAc $\alpha$ 1-4(Gal $\beta$ 1-3)GalNAc $\beta$ 1-                 | Escherichia coli O125    |
| 1220 | -2Fuc3(65%)Ac4(35%)Ac $\alpha$ 1-2Gal $\beta$ 1-3GalNAc $\alpha$ 1-3GalNAc $\alpha$ 1-                           | Escherichia coli O127    |
| 1221 | -4(GalNAc $\beta$ 1-3)Gal $\alpha$ 1-6Glc $\beta$ 1-3GalNAc $\beta$ 1-                                           | Escherichia coli O130    |
| 1222 | -3Rha $\alpha$ 1-3Rha $\alpha$ 1-2Glc $\alpha$ 1-3GlcNAc $\alpha$ 1-                                             | Escherichia coli O148    |
| 1223 | -3(S-Lac2-4)GlcNAc $\beta$ 1-2Rha $\alpha$ 1-2Rha $\alpha$ 1-3(Glc $\beta$ 1-2)Rha $\alpha$ 1-3GlcNAc $\beta$ 1- | Escherichia coli O150    |
| 1224 | -2Rib-ol5-P-6Gal $\alpha$ 1-3FucNAma1-3(GlcNAc $\beta$ 1-4)GlcNAc $\beta$ 1-                                     | Escherichia coli O151    |
| 1225 | -8(D-Ala1-7)Leg5Ac $\alpha$ 2-4GlcA $\beta$ 1-3GlcNAc $\beta$ 1-                                                 | Escherichia coli O161    |
| 1226 | -4(Fuca1-3)GlcNAc6(30%)Ac $\alpha$ 1-4GlcA $\alpha$ 1-3Fuca1-3GlcNAc $\beta$ 1-                                  | Escherichia coli O168    |
| 1227 | -2Gal $\beta$ 1-4Man $\beta$ 1-4Gal $\alpha$ 1-3GlcNAc $\beta$ 1-                                                | Escherichia coli O40     |
| 1228 | -2)Gal $\alpha$ 1-3(Fuca1-2)Gal $\beta$ 1-3GalNAc $\beta$ 1-3GalNAc $\beta$ 1-                                   | Escherichia coli O86:B7  |
| 1230 | Escherichia coli O10a10b                                                                                         | Escherichia coli O10a10b |
| 1231 | -2Glc $\beta$ 1-6GlcNAc $\alpha$ 1-3FucNAc $\alpha$ 1-3GlcNAc $\beta$ 1-                                         | Escherichia coli O12     |
| 1232 | Gal $\alpha$ 1-2Gal $\alpha$ 1-2(Gal $\beta$ 1-4)Glc $\alpha$ 1-3Glc $\alpha$ 1-/inner core-lipid A/             | Escherichia coli O14     |
| 1233 | -2Rha $\alpha$ 1-2Rha $\alpha$ 1-2Rha $\alpha$ 1-2Glc $\alpha$ 1-3GlcNAc6Ac $\alpha$ 1-                          | Escherichia coli O19ab   |
| 1234 | Escherichia coli O27                                                                                             | Escherichia coli O27     |
| 1236 | -4(D-Gro1-P-O-3)GalNAc $\beta$ 1-3Gal $\alpha$ 1-4Gal $\beta$ 1-3GalNAc $\beta$ 1-                               | Escherichia coli O37     |
| 1237 | -3(R-3HOBu1-4)Qui4Nb1-4(Gal $\alpha$ 1-3)Man $\alpha$ 1-4Rha $\alpha$ 1-3GlcNAc $\alpha$ -                       | Escherichia coli O39     |
| 1238 | -3Gal $\alpha$ 1-3(GlcA $\beta$ 1-4)Fuca1-4GlcNAc $\beta$ 1-3Fuca1-3GlcNAc $\beta$ 1-                            | Escherichia coli O41     |
| 1239 | Escherichia coli O54                                                                                             | Escherichia coli O54     |
| 1240 | Escherichia coli O62                                                                                             | Escherichia coli O62     |
| 1241 | Escherichia coli O81                                                                                             | Escherichia coli O81     |
| 1242 | -4GlcA $\beta$ 1-4(GlcNAc $\beta$ 1-2)GlcA $\beta$ 1-3GlcNAc $\alpha$ 1-                                         | Escherichia coli O30     |

|      |                                                                                                                                                   |                                                        |
|------|---------------------------------------------------------------------------------------------------------------------------------------------------|--------------------------------------------------------|
| 1243 | -4(Rha $\alpha$ 1-2Fuca $\alpha$ 1-3)Man $\alpha$ 1-3Fuca $\alpha$ 1-3GlcNAc $\beta$ 1-                                                           | Escherichia coli O36                                   |
| 1246 | -4(D-aThr3(70%)Ac2-6)GlcA $\beta$ 1-6Gal $\beta$ 1-6Glc $\beta$ 1-3GalNAc6(15%)Acb1-                                                              | Escherichia coli O46                                   |
| 1247 | -6(Rha $\alpha$ 1-3)Man $\alpha$ 1-2(Glc $\alpha$ 1-3)Man $\alpha$ 1-2Man $\alpha$ 1-2Man $\beta$ 1-3GlcNAc $\alpha$ 1-                           | Escherichia coli O68                                   |
| 1248 | GlcNAc $\alpha$ 1-2Glc $\alpha$ 1-2Glc $\alpha$ 1-3(Gal $\alpha$ 1-6)Glc $\alpha$ 1-/inner core-lipid A/                                          | Escherichia coli O100                                  |
| 1249 | Escherichia coli O102                                                                                                                             | Escherichia coli O102                                  |
| 1250 | -3(Rha $\alpha$ 1-4)GlcA $\alpha$ 1-2Rha $\alpha$ 1-2Rha $\alpha$ 1-2Gal $\alpha$ 1-3GalNAc $\beta$ 1-                                            | Escherichia coli O120                                  |
| 1251 | -2Rha $\alpha$ 1-2Rha $\alpha$ 1-3Rha2Ac $\alpha$ 1-3(Glc $\alpha$ 1-6)GlcNAc $\beta$ 1-                                                          | Escherichia coli O135                                  |
| 1252 | -3(Galf $\alpha$ 1-2Rha $\alpha$ 1-4)Gal $\beta$ 1-4Glc $\alpha$ 1-4GlcA $\alpha$ 1-3GalNAc $\beta$ 1-                                            | Escherichia coli O140                                  |
| 1253 | -2Ribf $\beta$ 1-4Gal $\beta$ 1-4GlcNAc $\alpha$ 1-4Gal $\beta$ 1-3GlcNAc $\alpha$ 1-                                                             | Escherichia coli O153                                  |
| 1254 | -2(ManNAc $\alpha$ 1-3)Rha $\alpha$ 1-3Rha $\alpha$ 1-3Rha $\alpha$ 1-3GalNAc $\alpha$ 1-                                                         | Escherichia coli O154                                  |
| 1255 | -2Rha4NAc $\alpha$ 1-3Fuca $\alpha$ 1-4Glc $\beta$ 1-3GalNAc $\alpha$ 1-                                                                          | Escherichia coli O157                                  |
| 1256 | -4(Rha $\alpha$ 1-3)(Glc $\alpha$ 1-6)Glc $\alpha$ 1-3GalNAc $\alpha$ 1-3GalNAc $\beta$ 1-                                                        | Escherichia coli O158                                  |
| 1257 | -2Man $\beta$ 1-4GlcA $\beta$ 1-3LQuiNAc $\alpha$ 1-3GlcNAc $\alpha$ 1-                                                                           | Escherichia coli O163                                  |
| 1258 | -4ManNAc3NAcA $\beta$ 1-2Rha $\alpha$ 1-3Rha $\beta$ 1-4GlcNAc $\alpha$ 1-                                                                        | Escherichia coli O180                                  |
| 1259 | Escherichia coli O84-deAc                                                                                                                         | Escherichia coli O84-deAc                              |
| 1301 | -3(Qui3NFoa $\alpha$ 1-4)GalA6NH2 $\alpha$ 1-4GalNAc $\alpha$ 1-4Gal $\alpha$ 1-3GalNAc $\beta$ 1-                                                | Providencia alcalifaciens O3                           |
| 1302 | Providencia alcalifaciens O3_2 capsular polysaccharide                                                                                            | Providencia alcalifaciens O3_2 capsular polysaccharide |
| 1303 | -4GlcNAc $\beta$ 1-3GlcA $\alpha$ 1-4GlcNAc $\alpha$ 1-3Rha2Acb1-                                                                                 | Providencia alcalifaciens O7                           |
| 1304 | -2Glc $\beta$ 1-6Gal $\alpha$ 1-6GalNAc $\alpha$ 1-4(Glc $\beta$ 1-3)GalNAc $\alpha$ 1-3GalNAc $\alpha$ 1-                                        | Providencia alcalifaciens O9                           |
| 1305 | Providencia rustigianii O11 capsular polysaccharide                                                                                               | Providencia rustigianii O11 capsular polysaccharide    |
| 1306 | -4(GlcNAc $\beta$ 1-2Glc $\beta$ 1-2)(GlcNAc $\beta$ 1-3)Gal $\beta$ 1-3GalNAc $\alpha$ 1-4Gal $\beta$ 1-3GalNAc $\beta$ 1-                       | Providencia alcalifaciens O12                          |
| 1307 | -4(D-GroA1NH2(2-P-3))GalNAc $\beta$ 1-4Gal $\beta$ 1-3FucNAc4Nb1-                                                                                 | Providencia alcalifaciens O22                          |
| 1308 | -3(Dhpa2-4Man $\beta$ 1-4)Gal $\alpha$ 1-4GalNAc $\beta$ 1-3GalNAc $\beta$ 1-                                                                     | Providencia alcalifaciens O31                          |
| 1309 | -4Qui3NFob1-3Gal $\alpha$ 1-3GlcA $\beta$ 1-3GalNAc $\beta$ 1-                                                                                    | Providencia alcalifaciens O40                          |
| 1310 | -3GlcA $\beta$ 1-4(Glc $\alpha$ 1-3)Fuca $\alpha$ 1-4Fuca $\alpha$ 1-2Glc $\beta$ 1-3GlcNAc $\alpha$ 1-                                           | Providencia alcalifaciens O46-deAc                     |
| 1311 | -3Man $\alpha$ 1-2Fuca $\alpha$ 1-2GlcA4Acb1-3GalNAc $\alpha$ 1-                                                                                  | Providencia alcalifaciens O48                          |
| 1312 | -4Glc $\beta$ 1-3Gal $\alpha$ 1-4GalNAc $\beta$ 1-4(L-Ser2-6)GlcA $\beta$ 1-3GalNAc $\beta$ 1-                                                    | Providencia alcalifaciens O60                          |
| 1401 | GalNAc $\alpha$ 1-4GlcNAc3NAcA $\beta$ 1-3DFucNAc $\alpha$ 1-3QuiNAc $\beta$ 1-3Rha $\alpha$ 1-3(Glc $\alpha$ 1-6)Glc $\beta$ 1-3(Glc $\alpha$ 1- | Pseudomonas aeruginosa O1(F4)                          |

|      |                                                                                                                                                                                                                   |                                          |
|------|-------------------------------------------------------------------------------------------------------------------------------------------------------------------------------------------------------------------|------------------------------------------|
|      | 4)(L-Ala1-2)GalNAc(P-6)1-3L-gro-manHepp7Cma1-3(P-2)(P-4)L-gro-manHepa1-5Kdoa                                                                                                                                      |                                          |
| 1402 | -3Rha $\alpha$ 1-4GalNAcA $\alpha$ 1-3QuiNAc $\alpha$ 1-                                                                                                                                                          | <i>Pseudomonas aeruginosa</i> O10ac(F5)  |
| 1403 | -2LGlc $\beta$ 1-3FucNAc $\alpha$ 1-3DFucNAc $\beta$ 1-                                                                                                                                                           | <i>Pseudomonas aeruginosa</i> O11ab      |
| 1404 | -2Rha $\alpha$ 1-3Rha $\alpha$ 1-4GalNAcA3Ac $\alpha$ 1-3QuiNAc $\beta$ 1-                                                                                                                                        | <i>Pseudomonas aeruginosa</i> O13ab      |
| 1405 | Rha $\alpha$ 1-3Rha $\alpha$ 1-4GalNAcA $\alpha$ 1-3QuiNAc $\beta$ 1-3Rha $\alpha$ 1-3(Glc $\alpha$ 1-6)Glc $\beta$ 1-3(Glc $\alpha$ 1-4)(L-Ala1-2GalNAc1-3(P-6)L-gro-manHep7Cma1-3(P-2)(P-4)L-gro-manHepa1-5Kdoa | <i>Pseudomonas aeruginosa</i> O13ac      |
| 1406 | Glc $\alpha$ 1-6Glc $\beta$ 1-3(Rha $\alpha$ 1-6Glc $\alpha$ 1-4)GalNAc1-3(P-6)L-gro-manHepa1-3(P-2)(P-4)L-gro-manHepa1-5(Kdoa2-4)Kdoa2-6(P-4)GlcNb1-6GlcNa1-P                                                    | <i>Pseudomonas aeruginosa</i> O14        |
| 1407 | -2Ribf $\beta$ 1-3GalNAc $\alpha$ 1-                                                                                                                                                                              | <i>Pseudomonas aeruginosa</i> O15        |
| 1408 | <i>Pseudomonas aeruginosa</i> O2abc                                                                                                                                                                               | <i>Pseudomonas aeruginosa</i> O2abc      |
| 1409 | -4ManNAc3NAma $\beta$ 1-4LGulNAc3NAcA $\alpha$ 1-3DFucNAc4Nb1-                                                                                                                                                    | <i>Pseudomonas aeruginosa</i> O2ac       |
| 1410 | -4ManNAc3NAma $\beta$ 1-4LGulNAc3NAcA $\alpha$ 1-3DFucNAc $\beta$ 1-                                                                                                                                              | <i>Pseudomonas aeruginosa</i> O2ac(F3)   |
| 1411 | -4ManNAc3NAma $\beta$ 1-4ManNAc3NAcA $\beta$ 1-3DFucNAc $\alpha$ 1-                                                                                                                                               | <i>Pseudomonas aeruginosa</i> O2ad(F7)   |
| 1412 | -4LGulNAc3NAma $\alpha$ 1-4ManNAc3NAcA $\beta$ 1-3DFucNAc4Ac $\alpha$ 1-                                                                                                                                          | <i>Pseudomonas aeruginosa</i> O2adf      |
| 1413 | -2LRha3Ac $\alpha$ 1-6GlcNAc $\alpha$ 1-4GalNAcA3Ac $\alpha$ 1-3(S-3HOBu1-4)QuiNAc4Nb1-                                                                                                                           | <i>Pseudomonas aeruginosa</i> O3(Habs 3) |
| 1414 | -2Rha3Ac $\alpha$ 1-6GlcNAc $\alpha$ 1-4GalNAcA $\alpha$ 1-3QuiNAc4NSHb $\beta$ 1-                                                                                                                                | <i>Pseudomonas aeruginosa</i> O3ab       |
| 1415 | -2Rha $\alpha$ 1-3FucNAc $\alpha$ 1-3FucNAc $\alpha$ 1-3QuiNAc $\alpha$ 1-                                                                                                                                        | <i>Pseudomonas aeruginosa</i> O4ab       |
| 1416 | -2Rha $\alpha$ 1-3FucNAc $\alpha$ 1-3FucNAc $\alpha$ 1-3DFucNAc $\alpha$ 1-                                                                                                                                       | <i>Pseudomonas aeruginosa</i> O4ac       |
| 1417 | -2Rha $\alpha$ 1-4GalNAcA3Ac $\alpha$ 1-4GalNFoA $\alpha$ 1-3QuiNAc $\alpha$ 1-                                                                                                                                   | <i>Pseudomonas aeruginosa</i> O6(F1)     |
| 1418 | -3R-3HOBu1-7Pse4Ac5Ac $\beta$ 2-4DFucNAc $\alpha$ 1-3QuiNAc $\beta$ 1-                                                                                                                                            | <i>Pseudomonas aeruginosa</i> O9ad       |
| 1419 | <i>Pseudomonas aeruginosa</i> O10a10b                                                                                                                                                                             | <i>Pseudomonas aeruginosa</i> O10a10b    |
| 1501 | <i>Proteus genomospecies</i> 5/6 O79                                                                                                                                                                              | <i>Proteus genomospecies</i> 5/6 O79     |
| 1502 | -3GalNAc $\beta$ 1-4(L6dTala1-3)Man $\alpha$ 1-3L6dTala1-                                                                                                                                                         | <i>Aeromonas hydrophila</i> O34-deAc     |
| 1503 | -2Rha $\alpha$ 1-2Rha $\alpha$ 1-2Rha $\alpha$ 1-4GalA $\alpha$ 1-3GlcNAc $\alpha$ 1-                                                                                                                             | <i>Enterobacter cloacae</i> G2277        |
| 1504 | -3Rha $\beta$ 1-4(Glc $\alpha$ 1-3)Rha $\alpha$ 1-2Rha $\alpha$ 1-3Gal $\alpha$ 1-3DFucNAc $\alpha$ 1-                                                                                                            | <i>Enterobacter cloacae</i> G3421        |
| 1601 | <i>Proteus mirabilis</i> 12B-r                                                                                                                                                                                    | <i>Proteus mirabilis</i> 12B-r           |
| 1602 | -3(Rib1(50%)Ac-ol5-P-6)Gal $\beta$ 1-4(GlcNAc $\beta$ 1-2)Glc $\beta$ 1-3GlcNAc $\beta$ 1-                                                                                                                        | <i>Proteus mirabilis</i> 1B-m            |
| 1603 | -2Glc $\beta$ 1-3L6dTal2(85%)Ac $\alpha$ 1-3GlcNAc $\beta$ 1-                                                                                                                                                     | <i>Proteus mirabilis</i> 3B-m            |
| 1604 | -4(LAltpA $\alpha$ 1-3)GalNAc $\alpha$ 1-3GalA $\alpha$ 1-3GlcNAc $\alpha$ 1-                                                                                                                                     | <i>Proteus mirabilis</i> HJ 4320         |
| 1605 | -3(Glc $\alpha$ 1-6)GlcNAc $\beta$ 1-4(GlcNAc $\beta$ 1-2)GlcA $\beta$ 1-3(L-Thr2-6)GalA $\beta$ 1-                                                                                                               | <i>Proteus mirabilis</i> O11             |

|      |                                                                                                           |                            |
|------|-----------------------------------------------------------------------------------------------------------|----------------------------|
| 1606 | -3GlcNAc $\beta$ 1-3(S,R-CetLys2-6GalA $\alpha$ 1-4)Gal $\alpha$ 1-                                       | Proteus mirabilis O13      |
| 1607 | GalNAc $\beta$ 1-4GalNAc $\alpha$ 1-3GlcNAc $\alpha$ 1-2Rib-ol                                            | Proteus mirabilis O16      |
| 1608 | -3GlcA $\beta$ 1-4(Gal $\alpha$ 1-3)FucNAc $\alpha$ 1-3GlcNAc $\alpha$ 1-                                 | Proteus mirabilis O23      |
| 1609 | -4(Lys2-6)GalA $\alpha$ 1-4Gal $\alpha$ 1-3(Ser-(2-6)GalA4Ac $\alpha$ 1-3GlcNAc $\beta$ 1-                | Proteus mirabilis O28      |
| 1610 | -3LQuiNAc $\alpha$ 1-3GlcNAc $\alpha$ 1-6(S-Lac-1-3)GlcNAc $\alpha$ 1-                                    | Proteus mirabilis O31      |
| 1611 | -2(Rib-ol5-P-3)Gal $\beta$ 1-3GlcNAc $\alpha$ 1-3(EtN1-75%P-6)Glc $\beta$ 1-3GlcNAc $\beta$ 1-            | Proteus mirabilis O33      |
| 1612 | -2Fuc3N(R-3HOBu)4Ac $\beta$ 1-6Glc3Ac $\alpha$ 1-4GlcA $\beta$ 1-3GlcNAc $\alpha$ 1-                      | Proteus mirabilis O35      |
| 1613 | -3(EtNAc1-P-6)GlcNAc $\alpha$ 1-3D-Asp2Ac4-4)Qui4Nb1-6Glc $\alpha$ 1-4GalA $\alpha$ 1-                    | Proteus mirabilis O38      |
| 1614 | -6(GalA6(L-Lys)a1-4)GalNAc $\beta$ 1-4(Glc $\alpha$ 1-2)GlcA $\beta$ 1-3GalNAc $\beta$ 1-                 | Proteus mirabilis O3ab     |
| 1615 | -4(GalA6(L-Thr)3Ac $\alpha$ 1-3)GalNAc $\beta$ 1-3Rha $\beta$ 1-4GlcNAc6Ac $\beta$ 1-                     | Proteus mirabilis O58      |
| 1616 | -4(GlcA $\alpha$ 1-3)FucNAc $\alpha$ 1-3GlcNAc $\beta$ 1-                                                 | Proteus mirabilis O6       |
| 1617 | -4(S,R-CetLys2-6)GlcA $\beta$ 1-6GalNAc $\alpha$ 1-6GlcNAc $\beta$ 1-3GlcNAc $\beta$ 1-                   | Proteus mirabilis O60      |
| 1618 | -6GlcNAc $\alpha$ 1-3Gal $\beta$ 1-3GalNAc $\alpha$ 1-                                                    | Proteus mirabilis OE       |
| 1701 | -3GlcA $\beta$ 1-4(Gal $\alpha$ 1-3)FucNAc $\alpha$ 1-3GlcNAc $\alpha$ 1-                                 | Proteus penneri 107        |
| 1702 | -3(Glc $\beta$ 1-3GlcNAc4(S-Lac)b1-2)Rha $\alpha$ 1-2Rha $\alpha$ 1-2Gal6Ac $\alpha$ 1-3GlcNAc $\beta$ 1- | Proteus penneri 113        |
| 1703 | -4(Glc $\alpha$ 1-2)GlcA3Ac $\beta$ 1-3GlcNAc $\alpha$ 1-2(R-3HOBu1-3)Fuc3Nb1-6Glc4Ac $\alpha$ 1-         | Proteus penneri 17         |
| 1704 | -6GlcNAc3(S-Lac)a1-3LQuiNAc $\alpha$ 1-3GlcNAc $\alpha$ 1-                                                | Proteus penneri 28         |
| 1705 | -3Gal $\alpha$ 1-4GalNAc $\alpha$ 1-3FucNAc $\alpha$ 1-3(EtN1-P-6)GlcAc $\beta$ 1-                        | Proteus penneri 31         |
| 1706 | -6(S-Lac2-3)GlcNAc $\beta$ 1-3Gal $\alpha$ 1-3GlcNAc6Ac $\beta$ 1-                                        | Proteus penneri 40         |
| 1707 | -4(Glc $\alpha$ 1-3)Glc $\beta$ 1-3Gal $\beta$ 1-3GalNAc $\beta$ 1-4Rib-ol5-P-                            | Proteus penneri 75         |
| 1801 | -3(EtN1-P-6)GlcNAc $\alpha$ 1-2(R-3HOBu1-3)Fuc3Nb1-6Glc $\alpha$ 1-4GlcA $\beta$ 1-                       | Proteus vulgaris 32/57 O17 |
| 1802 | -4(L-Ala2-6)GlcA $\beta$ 1-3GalNAc $\beta$ 1-4Glc $\beta$ 1-3Gal $\alpha$ 1-4GalNAc $\beta$ 1-            | Proteus vulgaris 70/57 O44 |
| 1803 | -4GalN6Ac $\alpha$ 1-3DFuc2Ac $\alpha$ 1-3(EtN1-P-6)GlcNAc $\beta$ 1-3Gal $\alpha$ 1-                     | Proteus vulgaris O19ab     |
| 1804 | -3GlcNAc $\beta$ 1-3(Qui3NAc2(65%)Ac4Ac $\alpha$ 1-2)Rha $\beta$ 1-4Rha $\alpha$ 1-4GlcA $\beta$ 1-       | Proteus vulgaris O22       |
| 1805 | -4GalNAc $\beta$ 1-3GlcNAc $\beta$ 1-2(R-Lac1-3Glc $\alpha$ 1-3)Rha $\alpha$ 1-2Ribf $\beta$ 1-           | Proteus vulgaris O25       |
| 1806 | -4GlcA $\beta$ 1-3GlcNAc $\beta$ 1-2(R-3HOBu1-2L-Ala1-4)Qui4Nb1-3Gal $\alpha$ 1-                          | Proteus vulgaris O4        |
| 1807 | -4Glc6(65%)Ac $\alpha$ 1-3GlcA4Ac $\beta$ 1-3GlcNAc $\alpha$ 1-3GlcA4(87%)Ac $\beta$ 1-                   | Proteus vulgaris O46       |
| 1808 | -4Glc $\beta$ 1-3GalNAc $\beta$ 1-4GalNAc $\beta$ 1-4Gal $\beta$ 1-                                       | Proteus vulgaris O65       |
| 1809 | -4LQuiNAc $\alpha$ 1-3GlcNAc $\alpha$ 1-4(LQuiNAc $\alpha$ 1-3)GalNAc $\alpha$ 1-4Gal $\alpha$ 1-P        | Proteus vulgaris OX19      |
| 1810 | -4Glc $\beta$ 1-3GalNAc $\beta$ 1-4GalNAc $\beta$ 1-4Gal $\beta$ 1-                                       | Proteus vulgaris TG251     |

|      |                                                                     |                                 |
|------|---------------------------------------------------------------------|---------------------------------|
| 1901 | Acinetobacter baumannii LUH5534                                     | Acinetobacter baumannii LUH5534 |
| 2001 | -3(Ribfβ1-4GlcAβ1-4)Galα1-6Manα1-2Manα1-3GalNAcβ1-                  | Shigella boydii type 10         |
| 2002 | -3GlcNAcβ1-4GlcA3Acb1-2(Rha3Aca1-3)Manα1-4Galβ1-                    | Shigella boydii type 12         |
| 2003 | -6Galα1-4GlcAβ1-6Galβ1-4Galβ1-4GlcNAcβ1-                            | Shigella boydii type 14         |
| 2004 | -4(GlcNAcβ1-3)GalNAcα1-4Glcα1-4L-IdoAα1-3GalNAcβ1-                  | Shigella boydii type 15         |
| 2005 | -4GlcAβ1-2(Galα1-3)Man6(50%)Acb1-4Manβ1-3GlcNAcβ1-                  | Shigella boydii type 16         |
| 2006 | -6(R-Lac2-4)Glcβ1-4GalNAcα1-3GalNAcβ1-                              | Shigella boydii type 17         |
| 2007 | -3Rhaβ1-4Rhaα1-2Rhaα1-2GalAα1-3GalNAcα1-                            | Shigella boydii type 18         |
| 2008 | -2Ribfβ1-4GalAα1-3GlcNAcα1-2(Galfb1-3)Rhaα1-2Rhaα1-2Ribfβ1-4GalAα1- | Shigella boydii type 2          |
| 2009 | -3(GlcAβ1-4)Galα1-6Manα1-2Manα1-3GalNAcβ1-                          | Shigella boydii type 6          |
| 2010 | -2Galfβ1-3GlcNAcα1-8(3HOBu1-7)Pse5Ac2-6Galα1-6Glcα1-                | Shigella boydii type 7          |
| 2011 | -3GalNAcα1-4GlcAβ1-3GlcNAcβ1-2GalAβ1-                               | Shigella boydii type 8          |
| 2012 | -4Glcα1-4GlcAβ1-3GlcNAcα1-3Rhaα1-                                   | Shigella boydii type 9          |
| 2013 | Shigella boydii type X                                              | Shigella boydii type X          |
| 2101 | -3Rhaα1-3Rhaα1-2Galα1-3GlcNAcα1-                                    | Shigella dysenteriae type 1     |
| 2102 | -1D-Gro3-P-6Glcβ1-4(Glcα1-6Gal2(25%)Aca1-3)FucNAcα1-3GlcNAcβ1-      | Shigella dysenteriae type 11    |
| 2103 | -3(R-Lac2-4Glcβ1-6Glcα1-4)Galβ1-6Galfb1-3GalNAcβ1-                  | Shigella dysenteriae type 3     |
| 2104 | -3GlcNAcα1-3(Fuc3Ac4Aca1-4)GlcNAcα1-4GlcAα1-3Fuca1-                 | Shigella dysenteriae type 4     |
| 2105 | GalNAcA3Ac6NH2α1-4GalNAcAα1-3GlcNAc                                 | Shigella dysenteriae type 7     |
| 2106 | -4GlcAβ1-3GalNAcβ1-3(GlcNAcβ1-4Glcβ1-4)GalNAcβ1-                    | Shigella dysenteriae type 8     |
| 2107 | -2Gal3,4(RPyr)b1-4Manβ1-4Galα1-3GlcNAcβ1-                           | Shigella dysenteriae type 9     |
| 2201 | -3GlcNAcβ1-2Rhaα1-2Rhaα1-3(Glcα1-4)Rhaα1-                           | Shigella flexneri type 2a       |
| 2202 | -3GlcNAcβ1-2(Glcα1-3)Rhaα1-2Rhaα1-3(Glcα1-4)Rhaα1-                  | Shigella flexneri type 2b       |
| 2203 | -3GlcNAcβ1-2(Glcα1-3)Rhaα1-2Rhaα1-3Rha2Aca1-                        | Shigella flexneri type 3a       |
| 2204 | -2Rhaα1-2Rhaα1-3Rha2Aca1-3GlcNAcβ1-                                 | Shigella flexneri type 3b       |
| 2205 | -3(Glcα1-6)GlcNAcβ1-2Rhaα1-2Rhaα1-3Rhaα1-                           | Shigella flexneri type 4a       |
| 2206 | -3(Glcα1-6)GlcNAcβ1-2Rhaα1-2Rhaα1-3Rha2Aca1-                        | Shigella flexneri type 4b       |
| 2207 | -3GlcNAcβ1-2Rhaα1-2(Glcα1-3)Rhaα1-3Rhaα1-                           | Shigella flexneri type 5a       |
| 2208 | -3GlcNAcβ1-2(Glcα1-3)Rhaα1-2(Glcα1-3)Rhaα1-3Rhaα1-                  | Shigella flexneri type 5b       |
| 2209 | -2Rha3(%)Ac4(%)Aca1-2Rhaα1-4GalAβ1-3GalNAcβ1-                       | Shigella flexneri type 6        |

|      |                                                                 |                                                    |
|------|-----------------------------------------------------------------|----------------------------------------------------|
| 2210 | -2Rha3(60%)Ac4(30%)Aca1-2Rhaα1-4GalAβ1-3GalNAcβ1-               | Shigella flexneri type 6b                          |
| 2211 | -3GlcNAcβ1-2(Glcα1-3)Rhaα1-2Rhaα1-3Rhaα1-                       | Shigella flexneri type X                           |
| 2212 | -2Rhaα1-2Rhaα1-3Rhaα1-3GlcNAcβ1-                                | Shigella flexneri type Y                           |
| 2213 | -3Rhaα1-3(Glcα1-4)GlcNAcβ1-2Rhaα1-2Rhaα1-                       | Shigella flexneri type 1a                          |
| 2214 | Shigella flexneri type 2c                                       | Shigella flexneri type 2c                          |
| 2215 | -2(EtN1-P-3)Rhaα1-2Rhaα1-3Rhaα1-3(Glcα1-6)GlcNAcβ1-             | Shigella flexneri 4av                              |
| 2216 | Shigella flexneri type 5c                                       | Shigella flexneri type 5c                          |
| 2217 | -2(Glcα1-3)Rhaα1-2Rhaα1-3Rhaα1-3(Glcα1-4)GlcNAcβ1-              | Shigella flexneri type 1d                          |
| 2219 | -2Rha3(%)Aca1-2Rhaα1-3Rhaα1-3GlcNAc6(%)Acb1-                    | Shigella flexneri Y_2                              |
| 2220 | -2(EtN1-P-3)Rhaα1-2(20%EtN1-P-3)Rhaα1-3Rhaα1-3GlcNAc6(45%)Acb1- | Shigella flexneri Yv                               |
| 2221 | -2(Glcα1-3)Rhaα1-2(EtN1-P-3)Rhaα1-3Rhaα1-3GlcNAcβ1-             | Shigella flexneri Xv                               |
| 2501 | Streptococcus equi sp. hyaluronic acid sodium salt              | Streptococcus equi sp. hyaluronic acid sodium salt |
| 2502 | -4(2-O-Su)IdoAα1-4(6-O-Su)GlcNSua1-; -4GlcAβ1-4GlcNAcα1-        | Heparin, MW7400                                    |
| 2601 | Acetobacter methanolicus LPS                                    | Acetobacter methanolicus LPS                       |
| 3001 | -3Glcβ1-                                                        | Saccharomyces cerevisiae zymozan A                 |
| 3002 | -6Manα1-                                                        | Yeast mannan (a)                                   |
| 3301 | -3Glcβ1-6Glcβ1-                                                 | Laminaria hyperborea laminarin                     |
| 3302 | -3Glcβ1-                                                        | B5-2 Laminaran                                     |
| 3401 | -4Glcβ1-4Glcβ1-3Glcβ1-                                          | Barley β-Glucan                                    |
| 3501 | Rha:Ara:Gal:GalA 9:3:79:9, MW 900-2000 kDa                      | Galactan-1 from flax bast fibre                    |
| 3502 | Rha:Ara:Gal:GalA 17:3:62:18, MW 100-400kDa                      | Galactan-2 from flax bast fibre                    |
| 8001 | -2)Galα1-3(Fuca1-2)Galβ1-3GalNAcβ1-3GalNAcβ1-LPS                | Escherichia coli O86:B7 LPS                        |
| 8002 | -3Rhaα1-3Rhaα1-2Glcα1-3GlcNAcα1- LPS                            | Escherichia coli O148 LPS                          |
| 8003 | -4(Fuca1-3)GlcNAc6(30%)Aca1-4GlcAα1-3Fuca1-3GlcNAcβ1- LPS       | Escherichia coli O168 LPS                          |
| 8004 | -4(GalNAcβ1-3)Galα1-6Glcβ1-3GalNAcβ1- LPS                       | Escherichia coli O130 LPS                          |
| 8005 | -2Rib-ol5-P-6Galα1-3FucNAma1-3(GlcNAcβ1-4)GlcNAcβ1- LPS         | Escherichia coli O151 LPS                          |
| 8006 | -3(Glcα1-2)Rhaα1-2Rhaα1-2Rhaα1-3(Glcα1-2)Rhaα1- LPS             | Escherichia coli O99 LPS                           |
| 8007 | -6Manα1-2(Glcα1-4)Manα1-2(Glcα1-3)Manβ1-3GlcNAcα1- LPS          | Escherichia coli O73 LPS                           |
| 8008 | -3Rib-ol5-P-6Galα1-3FucNAma1-3GlcNAcβ1- LPS                     | Escherichia coli O118 LPS                          |

|       |                                                                   |                                            |
|-------|-------------------------------------------------------------------|--------------------------------------------|
| 8009  | -4(R-Lac2-3Rhap2Acα1-3)Manβ1-4Manα1-3GalNAcβ1- LPS                | Escherichia coli O58 LPS                   |
| 8010  | -4(GlcpNAcβ1-3)GalNAcα1-2Glcα1-4L-IdoAα1-3GalNAcβ1- LPS           | Escherichia coli O112ab LPS                |
| 8011  | -3(S-Lac2-4)GlcNAcβ1-2Rhaα1-2Rhaα1-3(Glcβ1-2)Rhaα1-3GlcNAcβ1- LPS | Escherichia coli O150 LPS                  |
| 8012  | Escherichia coli O40 LPS                                          | Escherichia coli O40 LPS                   |
| 8013  | Escherichia coli O49 LPS                                          | Escherichia coli O49 LPS                   |
| 8014  | Escherichia coli O81 LPS                                          | Escherichia coli O81 LPS                   |
| 8015  | Escherichia coli O52 LPS                                          | Escherichia coli O52 LPS                   |
| 9001  | -3Glcβ1-3Glcβ1-3(Glcβ1-6)Glcβ1-                                   | Scleroglucan                               |
| 9002  | -3Glcβ1-                                                          | Curdlan                                    |
| 9003  | -4GlcN(%)Acb1-                                                    | Chitosan, high MW                          |
| 9004  | Saccharomyces cerevisiae mannan SIGMA                             | -                                          |
| 9005  | Bakers yeast glucan SIGMA                                         | -                                          |
| 9006  | Saccharomyces cerevisiae zymosan A SIGMA                          | -                                          |
| 9007  | Hyaluronic acid E77-2 KBL6413 17kDa                               | -                                          |
| 9008  | -4GlcAβ1-3(6-O-Su)GalNAcβ1-                                       | Hondroitin-6-Sulfate Sodium salt, MW 60000 |
| 10013 | N-protein SARS-CoV-2, Xema, 1 ug/ml                               | RE053N-1                                   |
| 10014 | N-protein SARS-CoV-2, Xema, 10 ug/ml                              | RE053N-10                                  |
| 10015 | RBD S-protein SARS-CoV-2, Xema, 1 ug/ml                           | RH053R-1                                   |
| 10016 | RBD S-protein SARS-CoV-2, Xema, 10 ug/ml                          | RH053R-10                                  |

#### Abbreviation:

sp1 = ol = aminoalditol

sp2 = C2 = -O(CH<sub>2</sub>)<sub>2</sub>NH<sub>2</sub>

sp3 = C3 = -O(CH<sub>2</sub>)<sub>3</sub>NH<sub>2</sub>

sp4 =Gly = -NHCOCH<sub>2</sub>NH<sub>2</sub>

sp5 =C8 = -O(CH<sub>2</sub>)<sub>3</sub>NH-CO(CH<sub>2</sub>)<sub>5</sub>NH<sub>2</sub>

sp6 = NH(*p*-C<sub>6</sub>H<sub>4</sub>)CH<sub>2</sub>CH<sub>2</sub>NH<sub>2</sub> (as-aminoalditol)

sp7 = Ph = -OC<sub>6</sub>H<sub>4</sub>-*p*-NH<sub>2</sub>

sp8 = PEG = -(OCH<sub>2</sub>CH<sub>2</sub>)<sub>6</sub>NH<sub>2</sub>



sp9 = Bn =  $-\text{OCH}_2\text{C}_6\text{H}_4\text{-p-NHCOCH}_2\text{NH}_2$

sp10 = PEG2 =  $-(\text{OCH}_2\text{CH}_2)_2\text{NH}_2$

sp11 =  $-\text{OCH}_2\text{CH}_2\text{CH}_2\text{SCH}_2\text{CH}_2\text{NH}_2$

sp12 = PEG3 =  $\text{H}_2\text{N}-(\text{CH}_2\text{CH}_2\text{O})_3-\text{CH}_2\text{CH}_2\text{CO}$

LPS - lipopolysaccharide

CPS - capsular polysaccharide

sp0 = other spacers: Asn, Ser, C2Et (see details in the column "Spacered form of saccharide")

Ala = alanine

Arg = arginine

Asn = asparagine,  $\text{NH-CO-CH}_2\text{CH}(\text{COOH})\text{NH}_2$

Ile = iso-leucine

Nle = norleucine

Ser = serine,  $-\text{OCH}_2\text{CH}(\text{COOH})\text{NH}_2$

Trp = tryptophan

Phe = phenylalanine,  $-\text{COCH}(\text{CH}_2\text{C}_6\text{H}_5)\text{NH}_2$

C2Et =  $-\text{O}(\text{CH}_2)_2\text{NH}_2$

Cit = citrullin

A =

Gal

AN = GalNAc

Ch = chito

F = L-Fuc

G =

Glc

Gc = glycolyl

GN =  $\text{GlcNAc}\beta$

R =

Rha

i = iso

(fur, f) = furanose cycle

Fm = formyl

Lac = lactose  
LN = N-acetyllactosamine  
M = Man  
MN = ManNAc  
Malt = maltose  
OS = oligosaccharide  
LPS = lipopolysaccharide  
P = phosphate  
S = Sia = Neu5Ac $\alpha$   
Su = sulfate  
Tn = GalNAc $\alpha$   
U = uronic acid  
D-Fuc3NRHb = 3,6-dideoxy-3-[(*R*)-3-hydroxybutanoyl]-D-galactose  
D-Xlu = D-*threo*-pent-2-ulose (D-xylulose)  
8eLeg = 8-epilegionaminic acid  
8-Leg = 8-legionaminic acid  
L-Ido = L-iduronic acid  
D-aThr = D-allothreonine  
Dhpa = (2R,4R)-2,4-dihydroxypentanoic acid  
L-6dTal = 6-deoxy-L-talose  
D-QuiNAc – N-acetyl-D-quinovosamine  
Pse - pseudaminic acid  
KDO - 3-deoxy- d-manno-oct-2-ulosonic acid or keto-deoxyoctulosonate  
6dmanHep - 6-deoxy-D-manno-heptose  
Aci - acinetaminic acid
